## 1 Title

2 Global impact and cost-effectiveness of one-dose versus two-dose human papillomavirus  
3 vaccination schedules: a comparative modelling analysis

4  
5 Kiesha Prem\*, Yoon Hong Choi†, Élodie Bénard†, Emily A Burger†, Liza Hadley, Jean-François  
6 Laprise, Mary Caroline Regan, Mélanie Drolet, Stephen Sy, Kaja Abbas, Allison Portnoy, Jane  
7 J Kim, Marc Brisson, Mark Jit\*

8  
9 \*Joint Corresponding Author

10 †Joint Second Author; contributed equally

## 11 Authors and Affiliations

12 Kiesha Prem

13 **Joint Corresponding Author**

14 Degree: PhD

15 Affiliations: Department of Infectious Disease Epidemiology, Faculty of Epidemiology and Population  
16 Health, London School of Hygiene & Tropical Medicine, London, United Kingdom; Saw Swee Hock  
17 School of Public Health, National University of Singapore and National University Health System,  
18 Singapore

19 Email: [kiesha.prem@lshtm.ac.uk](mailto:kiesha.prem@lshtm.ac.uk)

20

21 Yoon Hong Choi

22 **Joint Second Author**

23 Degree: PhD

24 Affiliations: Modelling and Economics Unit, Data, Analytics and Surveillance, UK Health Security  
25 Agency, London, United Kingdom

26 Email: [yoong.choi@ukhsa.gov.uk](mailto:yoong.choi@ukhsa.gov.uk)

27

28 Élodie Bénard

29 **Joint Second Author**

30 Degree: MSc

31 Affiliations: Centre de recherche du CHU de Québec - Université Laval, Québec, QC, Canada

32 Email: [elodie.benard.1@ulaval.ca](mailto:elodie.benard.1@ulaval.ca)

33

34 Emily A Burger

35 **Joint Second Author**

36 Degree: PhD

37 Affiliations: Center for Health Decision Science, Harvard T.H. Chan School of Public Health, Boston,  
38 MA, USA; Department of Health Management and Health Economics, University of Oslo, Oslo,  
39 Norway

40 Email: [eburger@hsph.harvard.edu](mailto:eburger@hsph.harvard.edu)

41

42 Liza Hadley

43 Degree: MMath

**NOTE: This preprint reports new research that has not been certified by peer review and should not be used to guide clinical practice.**

44 Affiliations: Department of Infectious Disease Epidemiology, Faculty of Epidemiology and Population  
45 Health, London School of Hygiene & Tropical Medicine, London, United Kingdom; Disease Dynamics  
46 Unit, Department of Veterinary Medicine, University of Cambridge, Cambridge, United Kingdom  
47 Email: [lh667@cam.ac.uk](mailto:lh667@cam.ac.uk)

48  
49 Jean-François Laprise  
50 Degree: PhD  
51 Affiliations: Centre de recherche du CHU de Québec - Université Laval, Québec, QC, Canada  
52 Email: [jean-francois.laprise@crchudequebec.ulaval.ca](mailto:jean-francois.laprise@crchudequebec.ulaval.ca)

53  
54 Mary Caroline Regan  
55 Degree: BA  
56 Affiliations: Center for Health Decision Science, Harvard T.H. Chan School of Public Health, Boston,  
57 MA, USA  
58 Email: [mregan@hsph.harvard.edu](mailto:mregan@hsph.harvard.edu)

59  
60 Mélanie Drolet  
61 Degree: PhD  
62 Affiliations: Centre de recherche du CHU de Québec - Université Laval, Québec, QC, Canada  
63 Email: [melanie.drolet@crchudequebec.ulaval.ca](mailto:melanie.drolet@crchudequebec.ulaval.ca)

64  
65 Stephen Sy  
66 Degree: MS  
67 Affiliations: Center for Health Decision Science, Harvard T.H. Chan School of Public Health, Boston,  
68 MA, USA  
69 Email: [ssy@hsph.harvard.edu](mailto:ssy@hsph.harvard.edu)

70  
71 Kaja Abbas  
72 Degree: PhD  
73 Affiliations: Department of Infectious Disease Epidemiology, Faculty of Epidemiology and Population  
74 Health, London School of Hygiene & Tropical Medicine, London, United Kingdom  
75 Email: [kaja.abbas@lshtm.ac.uk](mailto:kaja.abbas@lshtm.ac.uk)

76  
77 Allison Portnoy  
78 Degree: ScD  
79 Affiliations: Center for Health Decision Science, Harvard T.H. Chan School of Public Health, Boston,  
80 MA, USA  
81 Email: [aportnoy@mail.harvard.edu](mailto:aportnoy@mail.harvard.edu)

82  
83 Prof Jane J Kim  
84 Degree: PhD  
85 Affiliations: Center for Health Decision Science, Harvard T.H. Chan School of Public Health, Boston,  
86 MA, USA  
87 Email: [jkim@hsph.harvard.edu](mailto:jkim@hsph.harvard.edu)

88  
89 Prof Marc Brisson  
90 Degree: PhD  
91 Affiliations: Centre de recherche du CHU de Québec - Université Laval, Québec, QC, Canada;  
92 Department of Social and Preventive Medicine, Université Laval, Québec, QC, Canada; MRC Centre  
93 for Global Infectious Disease Analysis, Department of Infectious Disease Epidemiology, Imperial  
94 College London, London, UK

95 Email: [marc.brisson@crchudequebec.ulaval.ca](mailto:marc.brisson@crchudequebec.ulaval.ca)

96

97 Prof Mark Jit

98 **Joint Corresponding Author**

99 Degree: PhD

100 Affiliations: Department of Infectious Disease Epidemiology, Faculty of Epidemiology and Population

101 Health, London School of Hygiene & Tropical Medicine, London, United Kingdom; Modelling and

102 Economics Unit, National Infection Service, Public Health England, London, United Kingdom; School

103 of Public Health, University of Hong Kong, Hong Kong Special Administrative Region, China

104 Email: [mark.jit@lshtm.ac.uk](mailto:mark.jit@lshtm.ac.uk)

## 105 **Abstract**

### 106 **Background**

107 To eliminate cervical cancer as a public health problem, the World Health Organization  
108 currently recommends routine vaccination of adolescent girls with two doses of the human  
109 papillomavirus (HPV) vaccine before sexual initiation. However, many countries have yet to  
110 implement HPV vaccination because of financial or logistical barriers to delivering two doses  
111 outside the infant immunisation programme.

### 112 **Methods**

113 Using three independent HPV transmission models, we estimated the long-term health  
114 benefits and cost-effectiveness of one-dose versus two-dose HPV vaccination, in 188  
115 countries, assuming that one dose of the vaccine gives either a shorter duration of full  
116 protection (20 or 30 years) or lifelong protection but lower vaccine efficacy (e.g., 80%)  
117 compared to two doses. We simulated routine vaccination with the 9-valent HPV vaccine in  
118 10-year-old girls at 80% coverage for the years 2021–2120, with a one-year catch-up  
119 campaign of 11–14-year-old girls at 80% coverage in the first year of the programme.

### 120 **Results**

121 Over the years 2021–2120, one-dose vaccination at 80% coverage was projected to avert  
122 112.9 million (range of medians: 75.8–176.2) and 148.0 million (111.6–187.6) cervical cancer  
123 cases assuming one dose of the vaccine confers 20 and 30 years of protection, respectively.  
124 Should one dose of the vaccine provide lifelong protection at 80% vaccine efficacy, 155.2  
125 million (143.7–170.3) cervical cancer cases could be prevented. Around 65 to 889 additional  
126 girls would need to be vaccinated with the second dose to prevent one cervical cancer case,  
127 depending on the epidemiological profiles of the country. Across all income groups, the  
128 threshold cost for the second dose was low: from 0.85 (0.07–3.82) USD in low-income  
129 countries to 18.08 (-3.62–85.64) USD in high-income countries, assuming one-dose confers  
130 30-year protection.

131 **Conclusions**

132 Results were consistent across the three independent models and suggest that one-dose  
133 vaccination has similar health benefits to a two-dose programme while simplifying vaccine  
134 delivery, reducing costs, and alleviating vaccine supply constraints. The second dose may be  
135 cost-effective if there is a shorter duration of protection from one dose, cheaper vaccine  
136 and vaccination delivery strategies, and high burden of cervical cancer.

137

## 138 **Background**

139

140 Cervical cancer is the fourth leading cause of cancer mortality among women globally with  
141 an estimated 570 000 new cases and 311 000 deaths in 2018, with the majority of deaths  
142 occurring in low- and middle-income countries (LMICs) (1). Persistent infection with high-  
143 risk genotypes of human papillomavirus (HPV) is a necessary precursor of cervical cancer.

144

145 Primary prevention of cervical cancer is available with four highly efficacious prophylactic  
146 vaccines—two 2-valent, one 4-valent, one 9-valent—that are currently licensed for  
147 protection against HPV infection (2–5). All protect against the two most carcinogenic HPV  
148 types, 16 and 18, which are responsible for 70% of cervical cancer cases globally (6–8). Some  
149 additionally protect against HPV types 6 and 11, which do not cause cancer but are  
150 responsible for most cases of anogenital warts, and against other high-risk types such as  
151 HPV 31, 33, 45, 52, and 58 (either directly or through cross-protection), which have been  
152 linked to a further 20% of cervical cancer cases (6–8).

153

154 Multiple analyses including the global Papillomavirus Rapid Interface for Modelling and  
155 Economics (PRIME) model developed in collaboration with the World Health Organization  
156 (WHO) (9,10) have found HPV vaccination to be cost-effective in almost all countries. The  
157 HPV vaccines were initially administered as a three-dose regimen over six months. In 2014,  
158 the WHO Strategic Advisory Group of Experts on Immunization reviewed the evidence for  
159 dose reduction and recommended a two-dose regimen for individuals below 15 years of age  
160 (11). With the availability of vaccines and screening tests that allow detection of both high-  
161 risk HPV types and neoplasias that are precursors to cervical cancer, the Secretary-General

162 of WHO has called for global elimination of cervical cancer as a public health problem, i.e.,  
163 achieving the measurable global targets set by WHO (12). Current WHO guidelines  
164 recommend that all countries vaccinate females aged 9–14 years against HPV (13).

165

166 Although some of these vaccines have been licensed for more than a decade, LMICs with  
167 the highest incidence of cervical cancer are disproportionately less likely to introduce the  
168 HPV vaccine into their routine immunisation programmes (9,14–16). High vaccine  
169 procurement and delivery costs coupled with logistical constraints surrounding the delivery  
170 of a two-dose regimen outside the infant vaccination schedule has hampered vaccine  
171 introduction and uptake (17). Despite the financial support of Gavi, the Vaccine Alliance,  
172 many LMICs have yet to introduce HPV vaccines into their routine programmes (18,19).  
173 Since 2017, constrained supply of the 4-valent and 9-valent HPV vaccines has further  
174 delayed vaccine introductions in many countries (20,21). Moreover, physical distancing  
175 measures such as school closures and national lockdowns in response to the current COVID-  
176 19 pandemic (22) have caused eligible populations to miss doses of HPV vaccine (21).

177

178 These financial, logistical, and supply constraints have motivated research into one-dose  
179 vaccination schedules. If proven effective, one-dose HPV vaccination would simplify vaccine  
180 delivery and lower costs of national vaccination programmes (18,23). It could also expedite  
181 the introduction of HPV vaccines into national immunisation schedules for LMICs,  
182 potentially protecting many more females against cervical cancer (19).

183

184 Evidence is emerging from immunogenicity trials, post-hoc analyses of efficacy trials, and  
185 post-licensure observational studies to suggest that one dose of the HPV vaccine may  
186 provide a high level of protection against incident and persistent HPV infections.

187 A systematic review of participants in six clinical trials who received only one dose of HPV  
188 vaccination, because they did not complete their allocated schedules, suggests that this  
189 schedule may be as effective as two doses in preventing HPV infection in up to seven years  
190 of follow-up (24). However, evidence on the non-inferior efficacy of a single-dose schedule  
191 from participants randomised to receive one dose has yet to emerge (expected in 2025).  
192 Furthermore, antibody titres in immunogenicity trials were lower than in those receiving  
193 two or three doses. While inferior antibody titres may not necessarily translate to inferior  
194 protection, at this point, there is still uncertainty about the efficacy and durability of one-  
195 dose vaccination.

196  
197 Additionally, in the event that one-dose vaccination protection is slightly worse than two or  
198 three doses, populations may still be almost as well protected through indirect (herd)  
199 protection. Such effects can be examined using HPV transmission dynamic models. To date,  
200 model-based analyses set in the United Kingdom (UK) (25), the United States (US), and  
201 Uganda (26,27) suggest that one-dose schedules would be cost-effective and would prevent  
202 almost as many cancers as two-dose or three-dose schedules if one dose confers at least 20  
203 years of protection or has at least 80% efficacy against HPV 16/18 infection.

204  
205 In this paper, we compare the impact and cost-effectiveness of one-dose versus two-dose  
206 vaccination in 188 countries, assuming that one dose of the vaccine gives either shorter  
207 duration of protection or lower vaccine efficacy compared to two doses. We use a hybrid



208 approach: firstly, we consider the age-specific impact that HPV vaccines may have using the  
209 results of multiple independent HPV transmission dynamic models, and secondly,  
210 extrapolate these effects to the remaining countries in the world using data on population  
211 demographics and cervical cancer burden synthesised in a single model (PRIME).

212

## 213 **Methods**

214

215 To assess the extent to which one-dose HPV vaccination schedules will provide similar  
216 protection and be cost-effective compared to two doses, we compared the impact of three  
217 different strategies: (1) no HPV vaccination; (2) a one-dose HPV vaccination schedule in  
218 which we assume that one dose of the HPV vaccine confers either 20 or 30 years of full  
219 protection or 80% vaccine efficacy (VE) over the lifetime; and (3) a two-dose HPV  
220 vaccination schedule in which two doses of the vaccine would provide lifetime protection at  
221 100% VE. The minimum duration of protection in the waning scenarios for one-dose reflects  
222 the availability of over 10 years of data from various studies—ESCUDDO trial (28,29), IARC  
223 India post-randomisation analysis (30)—that do not show any evidence of waning of either  
224 clinical or immunological protection (31).

225

226 **Fig 1** provides an overview of the data sources and key steps of the modelling framework  
227 described in the following sections. We synthesised the long-term population-wide impact  
228 of HPV vaccination on cervical cancer incidence by age and time predicted by three  
229 published transmission dynamic models: (i) the Public Health England (PHE) model, a  
230 compartmental dynamic model set in the UK (32); (ii) the HPV-ADVISE model, an individual-

231 based dynamic model set in Uganda, Nigeria, India, Vietnam (27,33), and Canada (34,35);  
232 and (iii) the Harvard model, a hybrid model that links two individual-based models, set in  
233 the US, Uganda, El Salvador, and Nicaragua (14,36). In total, we combined results from 10  
234 model-country scenarios. The models have been extensively reviewed and used to inform  
235 vaccine policy (including by the UK's Joint Committee on Vaccination and Immunisation (37),  
236 the World Health Organization's Strategic Advisory Group of Experts on Immunization  
237 (11,38,39) and the US Advisory Committee on Immunization Practice (40–43). The models  
238 stratify population by age, gender, and sexual activity-based risk group, as well as screening  
239 behaviour-based risk group in the HPV-ADVISE and Harvard models. They capture HPV  
240 natural history and disease, as well as HPV transmission as informed by country-specific  
241 sexual behaviour surveys. More details about the models can be found in the  
242 **Supplementary Materials**. For the scenarios where one dose confers a shorter duration of  
243 protection (i.e., 20 or 30 years), we assume 100% VE, as suggested by clinical trial  
244 populations (24,28,30,31). We modelled routine annual vaccination with the 9-valent  
245 vaccine in 10-year-old girls to begin in 2021 and run uninterrupted until 2120. We also  
246 included catch-up vaccination of girls aged 11–14 years in the first year of the programme.  
247 Throughout, vaccine coverage was assumed to be 80%. In sensitivity analyses, we  
248 investigated the impact of a one-dose vaccination schedule with a bivalent vaccine  
249 **(Supplementary Materials)**.

250

251 **Fig 1. Overview of the data sources and the key steps of the modelling.** To compare the impact and  
252 cost-effectiveness of one-dose versus two-dose vaccination in 188 countries, we adopted a hybrid  
253 approach. First, we synthesised the age-specific impact of HPV vaccines of three published  
254 transmission dynamic models—PHE, HPV-ADVISE, Harvard—from 11 model-country settings.  
255 Second, we derived the primary impact of vaccination using a static model (PRIME). Third, we  
256 extrapolated the primary and secondary effects to the remaining countries in the world. Fourth, we  
257 measured and compared population-level impact (e.g., cervical cancers averted, number of females  
258 needed to be vaccinated, threshold costs of the first and second dose of the vaccine) for three

259 vaccine strategies: no HPV vaccination (the counterfactual); a one-dose HPV vaccination schedule in  
260 which we assume that one dose of the vaccine provides either a shorter duration of protection (20  
261 or 30 years) or lower vaccine efficacy (i.e., 80%) compared to two doses; and a two-dose HPV  
262 vaccination schedule in which two doses of the vaccine provides lifetime protection.  
263

264 Using PRIME, we then estimated the primary impact of a two-dose vaccination schedule,  
265 without herd effects and waning immunity, in 188 countries. Full details of PRIME, including  
266 model equations and updates, are available at (9,10). As PRIME is a static model, it cannot  
267 estimate herd effects, nor can it capture the effect of waning vaccine immunity. Here, we  
268 introduced a novel method which compares results from PRIME and the three dynamic  
269 models—PHE, HPV-ADVISE, Harvard—set in nine countries—UK, US, Canada, Nigeria,  
270 Uganda, India, Vietnam, El Salvador, and Nicaragua. We calculated the difference between  
271 cervical cancer incidence predicted by PRIME and each of the dynamic models to derive the  
272 secondary effects of vaccination, which is a combination of waning immunity (20/30-year  
273 duration vs lifetime protection and lower vaccine efficacy) and herd effects at every age and  
274 time-point. We then calculated the ratio of secondary to primary vaccine impact. By  
275 assuming that the primary impact of a vaccine (i.e., vaccine with lifetime protection and no  
276 herd effects) is different in every country as estimated by PRIME, we extrapolated the ratio  
277 (secondary to primary) to other countries to project the secondary effects of vaccination,  
278 using a similar approach as two comparative modelling analyses conducted by the WHO’s  
279 Cervical Cancer Elimination Modelling Consortium (14,44). A meta-analysis by Drolet and  
280 colleagues showed a significant decrease in the prevalence of HPV 16 and 18 among women  
281 aged 20–24 years (risk ratio [RR] 0.34, 95% CI 0.23–0.49) and 25–29 years (RR 0.63, 95% CI  
282 0.41–0.97) (45). As most of the women in these age groups were unvaccinated, the meta-  
283 analysis found evidence of similar herd effects more than four years after the introduction  
284 of HPV vaccination.

285

286 Uncertainty in predictions was captured by generating multiple simulations from the three  
287 dynamic models representing different plausible parameter sets. For the PHE model, 100  
288 runs were simulated from the best-fitting parameter sets to capture uncertainty in the  
289 duration of infection, duration of natural immunity, screening accuracy, the progression of  
290 cervical cancer, age-specific prevalence, and the number of sexual partners. For HPV-  
291 ADVISE, 1000 runs were simulated from 50 parameter sets that simultaneously fit country-  
292 specific behavioural and epidemiological data. These 50 parameter sets illustrate the  
293 uncertainty in sexual behaviour, HPV transmission, the natural history of HPV-related  
294 diseases, and screening. For the Harvard model that reflect two sexual behaviour settings  
295 (low- and high-HPV prevalence), 50 best-fitting dynamic transmission model parameter sets,  
296 capturing variations in genotype- and sex-specific transmission probability, and genotype-  
297 and sex-specific natural immunity, were propagated through four cervical carcinogenesis  
298 models that have been previously calibrated (i.e., fit) to the US, Uganda, El Salvador, or  
299 Nicaragua (14,36).

### 300 **Effectiveness and cost-effectiveness measures**

301 For each country, we estimated the number of cervical cancer cases, deaths, and disability-  
302 adjusted life years (DALYs)—caused by HPV 16, 18, 31, 33, 45, 52, and 58—occurring under  
303 each scenario by age and time since vaccination in females born in the years 2011–2110  
304 (Section 1.8 **Supplementary materials**). We then compared the impact of a one-dose  
305 schedule (giving 20/30 years protection or lifelong protection but at 80% initial VE) with no  
306 vaccination, and a two-dose schedule (giving lifetime protection at 100% VE) with a one-  
307 dose schedule. We calculated the number of females needed to vaccinate with one dose,

308 and the number of females needed to give an additional (i.e., second) dose, to avert one  
309 cervical cancer case, death, or DALY. We also projected the threshold cost to pay for the  
310 first and second dose of vaccine, which is the maximum that could be paid for the first dose  
311 (compared to no vaccination) and second dose (compared to one dose only) for the  
312 incremental cost-effectiveness ratio to remain below country-specific gross domestic  
313 product (GDP) per capita (in 2017 USD). We used the GDP per capita estimates by the World  
314 Bank (46), but also considered a lower threshold , i.e., 30–40% and 60–65% of GDP per  
315 capita in low-income and middle- to high-income countries (47,48). The time horizon of the  
316 analysis was from 2021 to 2120; we accrued all health benefits of vaccination up to the end  
317 of the routine vaccination programme (i.e., the year 2120) or age 100 of all vaccinated  
318 cohorts, whichever came first. Using modelled results from the 10 model-country pairs, we  
319 projected the outcome measures in 188 countries and aggregated the results by World Bank  
320 income groups. After projecting the various measures of effectiveness and cost-  
321 effectiveness under the several vaccination scenarios, we compared the outcomes  
322 generated with results from the 10 model-country pairs. After projecting the various  
323 measures of effectiveness and cost-effectiveness under the vaccination scenarios, we  
324 compared the outcomes generated with results from the 10 model-country scenarios. We  
325 presented the results, aggregated by World Bank income groups (details in the  
326 **Supplementary Materials**), as the median (and 80% uncertainty intervals (UI)) from each of  
327 the model-country predictions. Both health outcomes and costs were discounted at 0% and  
328 3% per year (49).

329

## 330 Results

331

332 In 188 countries over the years 2021–2120, the models projected that routine annual  
333 vaccination of 10-year-old girls (plus a one-year catch-up campaign of girls aged 11–14  
334 years) with one-dose of the 9-valent HPV vaccine at 80% coverage would avert 112.9 million  
335 (range of medians: 75.8–176.2) and 148.0 million (111.6–187.6) cervical cancer cases should  
336 one dose of the vaccine confer 20 and 30 years of protection, respectively (**Fig 2**; with the  
337 equivalent cumulative and discounted benefits figures in the **Supplementary Materials**).

338 Under a scenario of one dose of the vaccine providing lifelong protection at 80% initial VE,  
339 the models predicted that 155.2 million (143.7–170.3) cervical cancer cases would be  
340 prevented (**Fig 2**). A one-dose schedule conferring 20 years of protection would avert 65.0%  
341 (range of medians: 45.8–91.8%) of the cases averted by the vaccination schedule providing  
342 lifelong protection at 100% VE (**Fig 3**). However, if the duration of protection increases to 30  
343 years, a one-dose schedule would avert more cases at 87.9% (range of medians: 59.6–100%)  
344 of the cases averted by the vaccination schedule providing lifelong protection at 100% VE  
345 (**Fig 3**). Similarly, for the scenario where one dose of the vaccine provides lifelong protection  
346 but at lower VE (of 80%), most of the cases (88.3% (range of medians: 86.2–96.7%)) can still  
347 be averted (**Fig 3**).

348

349 **Fig 2. Cervical cancers averted by routine one-dose HPV vaccination by country income groups.**  
350 The lines represent the median projections of the 10 model-country settings: the PHE model in  
351 black, HPV-ADVISE model-country pairs in red, and the Harvard model-country pairs in blue. The  
352 grey area corresponds to the additional cases averted in the vaccinated cohort after the 100 years of  
353 routine vaccination. Cancers averted were discounted at 0%. Only cervical cancer caused by HPV 16,  
354 18, 31, 33, 45, 52, and 58, which could be averted by the 9-valent HPV vaccine, were considered.  
355

356 **Fig 3. Cervical cancers averted by routine one-dose HPV vaccination as a proportion of cervical**  
357 **cancers averted by routine HPV vaccination programmes conferring lifelong protection at 100%**  
358 **vaccine efficacy.** The median percentage (intervals: 10–90th percentile) of cancers averted by a  
359 one-dose schedule compared to a two-dose programme of the 10 model-country settings: the PHE  
360 model in black, HPV-ADVISE model-country pairs in red, and the Harvard model-country pairs in  
361 blue. Health outcomes were discounted at 0%. Only cervical cancer caused by HPV 16, 18, 31, 33, 45,  
362 52, and 58, which could be averted by the 9-valent HPV vaccine, were considered.

363

364 Due to large disparities in age-standardised cervical cancer incidence across country income  
365 groups in 2021, the number of cases averted by routine vaccination programmes is higher in  
366 low-income countries (31.9 million (range of medians: 21.2–48.6), if one-dose confers 20  
367 years of protection) than in high-income countries (4.8 million (range of medians: 3.5–6.9)).  
368 More cervical cancers could be averted if one dose of the vaccine confers a longer duration  
369 of protection, i.e., at 30 years or lifelong but lowered VE. Assuming waning of protection at  
370 20 years (on average) after vaccination, the PHE model parameterised with data from the  
371 UK projected that a one-dose schedule could avert 91.8% (80%UI 76.2–99.8%) of the cases  
372 averted by a two-schedule vaccination schedule. However, the HPV-ADVISE and Harvard  
373 models, mostly parameterised with data from LMICs, projected that 61.0% (range of  
374 medians: 45.8–87.6%) could be averted (**Fig 3**).

375

376 The models consistently projected that fewer girls need to be vaccinated with the first dose  
377 to prevent one cervical cancer case in low-income countries (32 (range of medians: 23–51))  
378 than middle-income (43 (range of medians: 31–69)) and high-income countries (83 (range of  
379 medians: 67–122)) if one-dose confers 20 years of protection (**Fig 4A–C**). However,  
380 variations across models were observed for the projections of the number of girls needed to  
381 be vaccinated with the second dose to prevent one cervical cancer case. Compared to the

382 HPV-ADVISE and Harvard models, the PHE model projected that more girls need to be  
383 vaccinated with the second dose to avert one cervical cancer case when the protection from  
384 one dose of the vaccine wanes 20 years after vaccination (**Fig 4A–D**; 889 (80%UI 93–27 700)  
385 girls if one dose confers 20 years of protection). However, if one-dose confers lifelong  
386 protection but at lowered VE, the differences between the PHE, HPV-ADVISE and Harvard  
387 models decrease. When we discounted health outcomes, the model predicted that more  
388 girls need to be vaccinated to avert one cervical cancer case (**Fig 4E–H**).

389  
390 **Fig 4. Number of girls needed to be vaccinated with the first and second dose to avert one**  
391 **additional cervical cancer case by income group.** The lines represent the median projections of the  
392 10 model-country settings: the PHE model in black, HPV-ADVISE model-country pairs in red, and the  
393 Harvard model-country pairs in blue. The grey area corresponds to the additional cases averted in  
394 the vaccinated cohort after the 100 years of routine vaccination. Health outcomes were discounted  
395 at 3% (panels A–D) and 0% (panels E–H).

396  
397 Across all income groups, the threshold (i.e., maximum) cost for the second dose to remain  
398 cost-effective was low—from 0.85 (range of medians: 0.07–3.82) USD in low-income  
399 countries to 18.08 (range of medians: -3.62–85.64) USD in high-income countries if one-  
400 dose confers 30 year protection to—as few additional cancers would be averted with a  
401 longer duration of protection ( $\geq 30$  years) or higher VE ( $>80\%$ ). With a higher GDP per capita,  
402 middle- and high-income countries have a higher threshold cost (**Fig 5**). However, if one-  
403 dose confers  $\leq 20$  years of protection, the threshold cost for the second dose to remain cost-  
404 effective is borderline at 3.24 (range of medians: 0.34–5.35) USD in low-income countries  
405 and 62.93 (range of medians: 12.63–117.45) USD in high-income countries, suggesting that  
406 duration of protection remains the main driver of uncertainty.

407  
408 **Fig 5. Threshold cost to pay for the first and second dose of vaccine by country income groups.** The  
409 threshold cost is the maximum that could be paid for the first dose (compared to no vaccination)



410 and second dose (compared to one dose only) for the incremental cost-effectiveness ratio to remain  
411 below the cost-effectiveness threshold. Two cost-effectiveness thresholds are presented: a lower  
412 threshold as suggested by Jit (2020) in panels A–D and country gross domestic product (GDP) per  
413 capita (in 2017 USD) in panels E–H. The lower cost-effectiveness threshold presented in panels A–D  
414 is 30–40% and 60–65% of GDP per capita in low-income and middle- to high-income countries,  
415 respectively. Cost and health outcomes were discounted at 3% and 0%, respectively.

416

## 417 **Discussion**

418 In this study, three independent transmission dynamic models projected consistent results  
419 suggesting that routine one-dose HPV vaccine programmes at 80% coverage worldwide  
420 could provide a high level of population protection and be cost-effective. We considered  
421 three assumptions of the one-dose schedule: one dose of the HPV vaccine confers either 20  
422 or 30 years of protection at full VE, or lifelong protection but at 80% VE. Across all  
423 assumptions, one-dose schedules provide large population impacts on cervical cancer, while  
424 the difference in population impact of the one-dose versus two-dose vaccination schedule is  
425 small if one dose confers  $\geq 30$  years of protection or lifelong protection but at 80% VE. This  
426 underscores the significant potential public health impact of the one-dose vaccination  
427 schedule if vaccine uptake is high across all countries (21).

428

429 Although trials (28–30) and post-randomisation analyses (30) suggest that the duration of  
430 protection of one dose of the vaccine is more than ten years, it is uncertain how long  
431 vaccinated individuals will remain protected and how the vaccine would wane beyond the  
432 first decade. The threshold duration of protection for a one-dose schedule to avert the  
433 majority of vaccine-preventable cancers is associated with the ages at which individuals are  
434 vaccinated and reach peak sexual activity, which varies between countries. If one dose of  
435 the vaccine confers  $\leq 20$  years of protection, giving the second dose may have a larger health

436 impact, especially in settings where HPV transmission persists decades after vaccination.  
437 However, if one dose provides a longer duration of protection ( $\geq 30$  years), administering the  
438 second dose will bring about few health gains at potentially high costs. Hence, decisions on  
439 offering the second dose should account for the duration of protection provided by the first  
440 dose, whether it covers the peak years of sexual activity and HPV transmission, and the  
441 costs of delivering the additional dose. The second dose becomes more cost-effective if the  
442 protection from one dose is less than 20 years, the costs of the vaccine and delivering it are  
443 lower than current reported costs, and/or the local burden of cervical cancer is high.  
444  
445 Our comparison of one- and two-dose vaccination schedules is motivated by several  
446 advantages of a one-dose schedule. Firstly, many LMICs have yet to implement national HPV  
447 vaccination programmes because of the challenges of delivering two vaccine doses to  
448 adolescent females (17). Compared to two-dose HPV vaccination, a one-dose HPV  
449 vaccination schedule would be cheaper and easier to implement (e.g., no follow-up of  
450 vaccinated individuals would be required), potentially enabling more LMICs to introduce  
451 HPV vaccine into national immunisation schedules (21,23). More recently, HPV vaccine  
452 implementation in LMICs has been delayed due to constraints in HPV vaccine supply (20,21).  
453 Our model-based analysis predicts that routinely vaccinating 10-year-old girls at 80%  
454 coverage in LICs could result in four times (population-adjusted) more cervical cases averted  
455 than in high-income countries. Under our one-dose assumptions, routine one-dose HPV  
456 vaccination programmes could protect up to 155 million females against cervical cancer  
457 globally over the years 2021–2120.  
458

459 Secondly, the COVID-19 pandemic has disrupted several routine immunisation programmes  
460 (50–52), including HPV vaccination (21,53). Abbas and colleagues predicted that the benefits  
461 of resuming routine childhood immunisation services outweigh the risk of being infected  
462 with COVID-19 during the vaccination visits (52), reinforcing WHO's call for all countries to  
463 continue routine immunisation services safely (54). With physical distancing measures such  
464 as school closures and national lockdowns being implemented in many countries to cope  
465 with the COVID-19 pandemic (22), health officials grapple with reconfiguring school-based  
466 HPV vaccine delivery (53–55). Compared to the two-dose vaccination schedule, a one-dose  
467 schedule would further minimise interactions between vaccinees and health workers,  
468 simplifying vaccine delivery while also decreasing SARS-CoV-2 exposure.

469

470 The lack of country-specific behavioural, virological, and clinical data in many countries  
471 limits fitting transmission dynamic models individually to most countries (56). However, in  
472 this comparative modelling study, we synthesised results from three published dynamic  
473 models based in nine countries, covering high-, middle- and low-income settings across  
474 three continents and a wide variety of epidemiological characteristics for HPV transmission  
475 and cervical cancer (14,56). Our approach provides a common framework using PRIME for  
476 population demographics, cervical cancer burden, and impact/cost-effectiveness  
477 calculations, while varying representation of HPV transmission and cervical cancer natural  
478 history across the three dynamic models. We then extrapolated the age- and time-  
479 dependent ratio of the secondary to primary impacts of vaccine strategies to other  
480 countries. While there may be considerable uncertainty around extrapolating this ratio to  
481 another country, the use of 10 model-country pairs lends confidence that we are likely to  
482 have captured the range of possible outcomes for most countries. More precise estimates

483 would require fitting these models to additional specific countries, for which calibration  
484 data are not available (56,57).

485

486 Our model projections of vaccine impact also involve other sources of uncertainty that we  
487 did not explicitly quantify. The PRIME model uses country-specific cervical cancer burden  
488 from the Global Cancer Incidence, Mortality and Prevalence (GLOBOCAN) database (58),  
489 which may underestimate the full burden of HPV-related disease, and thus vaccine impact,  
490 in LMICs (14). In this study, we only assessed the effect of HPV vaccination on cervical  
491 cancers. If we also accounted for the vaccine impact on other HPV-related cancers, we  
492 would anticipate a greater value of HPV vaccination programmes (26,59). However, the  
493 paucity of data on the efficacy of one dose on non-cervical cancers complicates the analysis  
494 evaluating their vaccine impact. Because the health gains from the second dose are small,  
495 any minor variations in gains will amplify the variability in the number needed to vaccinate  
496 with the additional dose. Finally, we project the impact of HPV vaccination on cervical  
497 cancers over the next century. Over the past decades, we have witnessed substantial  
498 demographic (60) and behavioural changes (61,62) with extraordinary improvements in  
499 public health (63). In 2020, the COVID-19 pandemic has caused substantial disruptions to  
500 population demography (64) and sexual behaviour (65), with uncertainty around the longer-  
501 term consequences of such disruption. Moreover, over the next century, we expect to see  
502 continued advancements in pre-cancer screening and treatment services, which will further  
503 decrease cervical cancer incidence. Such uncertainties in life expectancy, population, and  
504 economic forecasts have significant implications for our predictions.

505

## 506 **Conclusion**

507 Under the scenarios where a single HPV vaccine dose confers more than 30 years of  
508 protection or 80% efficacy with lifelong protection, routine one-dose HPV vaccination  
509 provides the majority of health benefits to the two-dose programme while simplifying  
510 vaccine delivery, reducing costs, and circumventing vaccine supply constraints. The second  
511 dose may be cost-effective if there is a shorter duration of protection from one dose,  
512 cheaper vaccine and vaccination delivery strategies, and high burden of cervical cancer.  
513 These results are fairly consistent when projected from three independent transmission  
514 dynamic models used in nine countries. The outcomes of our comparative modelling  
515 analysis contribute to the extensive evidence base, including emerging evidence from the  
516 single-dose HPV vaccine trials and observational studies, which would be beneficial to  
517 policymakers when they consider HPV vaccination in their populations.

## 518 References

- 519 1. Bray F, Ferlay J, Soerjomataram I, Siegel RL, Torre LA, Jemal A. Global cancer statistics  
520 2018: GLOBOCAN estimates of incidence and mortality worldwide for 36 cancers in  
521 185 countries. *CA Cancer J Clin*. 2018;
- 522 2. Garland SM, Hernandez-Avila M, Wheeler CM, Perez G, Harper DM, Leodolter S, et al.  
523 Quadrivalent Vaccine against Human Papillomavirus to Prevent Anogenital Diseases.  
524 *N Engl J Med* [Internet]. 2007 May 10 [cited 2020 Oct 30];356(19):1928–43. Available  
525 from: [www.nejm.org](http://www.nejm.org)
- 526 3. Paavonen J, Naud P, Salmerón J, Wheeler CM, Chow SN, Apter D, et al. Efficacy of  
527 human papillomavirus (HPV)-16/18 AS04-adjuvanted vaccine against cervical  
528 infection and precancer caused by oncogenic HPV types (PATRICIA): final analysis of a  
529 double-blind, randomised study in young women. *Lancet*. 2009 Jul 25;374(9686):301–  
530 14.
- 531 4. Joura EA, Giuliano AR, Iversen O-E, Bouchard C, Mao C, Mehlsen J, et al. A 9-Valent  
532 HPV Vaccine against Infection and Intraepithelial Neoplasia in Women. *N Engl J Med*  
533 [Internet]. 2015 Feb 19 [cited 2020 Oct 30];372(8):711–23. Available from:  
534 <https://www.nejm.org/doi/full/10.1056/NEJMoa1405044>
- 535 5. Qiao YL, Wu T, Li RC, Hu YM, Wei LH, Li CG, et al. Efficacy, Safety, and Immunogenicity  
536 of an Escherichia coli-Produced Bivalent Human Papillomavirus Vaccine: An Interim  
537 Analysis of a Randomized Clinical Trial. *J Natl Cancer Inst* [Internet]. 2020 Feb 1 [cited  
538 2020 Nov 4];112(2):145–53. Available from:  
539 <https://academic.oup.com/jnci/article/112/2/145/5488952>
- 540 6. de Sanjose S, Quint WGV, Alemany L, Geraets DT, Klaustermeier JE, Lloveras B, et al.  
541 Human papillomavirus genotype attribution in invasive cervical cancer: a  
542 retrospective cross-sectional worldwide study. *Lancet Oncol*. 2010;
- 543 7. Serrano B, Alemany L, Tous S, Bruni L, Clifford GM, Weiss T, et al. Potential impact of  
544 a nine-valent vaccine in human papillomavirus related cervical disease. *Infect Agent*  
545 *Cancer* [Internet]. 2012 Dec 29 [cited 2020 Oct 30];7(1):1–13. Available from:  
546 <https://link.springer.com/articles/10.1186/1750-9378-7-38>
- 547 8. de Martel C, Georges D, Bray F, Ferlay J, Clifford GM. Global burden of cancer  
548 attributable to infections in 2018: a worldwide incidence analysis. *Lancet Glob Heal*  
549 [Internet]. 2020 Feb 1 [cited 2020 Oct 30];8(2):e180–90. Available from:  
550 [www.thelancet.com/lancetgh](http://www.thelancet.com/lancetgh)
- 551 9. Jit M, Brisson M, Portnoy A, Hutubessy R. Cost-effectiveness of female human  
552 papillomavirus vaccination in 179 countries: A PRIME modelling study. *Lancet Glob*  
553 *Heal* [Internet]. 2014 [cited 2020 Oct 30];2(7):e406–14. Available from:  
554 <https://pubmed.ncbi.nlm.nih.gov/25103394/>
- 555 10. Abbas KM, van Zandvoort K, Brisson M, Jit M. Effects of updated demography,  
556 disability weights, and cervical cancer burden on estimates of human papillomavirus  
557 vaccination impact at the global, regional, and national levels: a PRIME modelling  
558 study. *Lancet Glob Heal* [Internet]. 2020 Apr 1 [cited 2020 Oct 30];8(4):e536–44.  
559 Available from: <http://gco.iarc.fr>
- 560 11. World Health Organization. Human papillomavirus vaccines: WHO position paper,  
561 October 2014. *Wkly Epidemiol Rec Relev épidémiologique Hebd*. 2014;89(43):465–91.
- 562 12. World Health Organization. WHO | WHO leads the way towards the elimination of  
563 cervical cancer as a public health concern. World Health Organization; 2018.

- 564 13. Simms KT, Steinberg J, Caruana M, Smith MA, Lew J Bin, Soerjomataram I, et al.  
565 Impact of scaled up human papillomavirus vaccination and cervical screening and the  
566 potential for global elimination of cervical cancer in 181 countries, 2020–99: a  
567 modelling study. *Lancet Oncol.* 2019;
- 568 14. Brisson M, Kim JJ, Canfell K, Drolet M, Gingras G, Burger EA, et al. Impact of HPV  
569 vaccination and cervical screening on cervical cancer elimination: a comparative  
570 modelling analysis in 78 low-income and lower-middle-income countries. *Lancet*  
571 [Internet]. 2020 Feb 22 [cited 2020 Oct 30];395(10224):575–90. Available from:  
572 <https://doi.org/10.1016/>
- 573 15. PATH. Global HPV Vaccine Introduction Overview: projected and current national  
574 introductions, demonstration/pilot projects, gender-neutral vaccination programs,  
575 and global HPV vaccine introduction maps (2006–2022). [Internet]. 2020 May [cited  
576 2020 Oct 30]. Available from: [https://www.path.org/resources/global-hpv-vaccine-](https://www.path.org/resources/global-hpv-vaccine-introduction-overview/)  
577 [introduction-overview/](https://www.path.org/resources/global-hpv-vaccine-introduction-overview/)
- 578 16. WHO. Immunization, vaccines and biologicals: data, statistics and graphics. WHO  
579 [Internet]. 2020 [cited 2020 Oct 30]; Available from:  
580 [http://www.who.int/immunization/monitoring\\_surveillance/data/en/](http://www.who.int/immunization/monitoring_surveillance/data/en/)
- 581 17. Gallagher KE, LaMontagne DS, Watson-Jones D. Status of HPV vaccine introduction  
582 and barriers to country uptake. *Vaccine.* 2018 Aug 6;36(32):4761–7.
- 583 18. LaMontagne DS, Bloem PJN, Brotherton JML, Gallagher KE, Badiane O, Ndiaye C.  
584 Progress in HPV vaccination in low- and lower-middle-income countries. *Int J Gynecol*  
585 *Obstet* [Internet]. 2017 Jul 1 [cited 2020 Oct 30];138:7–14. Available from:  
586 <http://doi.wiley.com/10.1002/ijgo.12186>
- 587 19. Kreimer AR, Cernuschi T, Rees H, Saslow D, Porras C, Schiller J. Prioritisation of the  
588 human papillomavirus vaccine in a time of constrained supply. Vol. 4, *The Lancet*  
589 *Child and Adolescent Health.* Elsevier B.V.; 2020. p. 349–51.
- 590 20. World Health Organization. Global market study: HPV vaccines. World Health  
591 Organization; 2019.
- 592 21. World Health Organization. Meeting of the Strategic Advisory Group of Experts on  
593 Immunization, April 2022: conclusions and recommendations – Réunion du Groupe  
594 stratégique consultatif d’experts sur la vaccination, avril 2022: conclusions et  
595 recommandations. *Wkly Epidemiol Rec* [Internet]. 2022 [cited 2022 Jun  
596 20];97(24):261–76. Available from: <https://apps.who.int/iris/handle/10665/356580>
- 597 22. Viner RM, Russell SJ, Croker H, Packer J, Ward J, Stansfield C, et al. School closure and  
598 management practices during coronavirus outbreaks including COVID-19: a rapid  
599 systematic review. *Lancet Child Adolesc Heal* [Internet]. 2020 [cited 2020 Apr  
600 22];0(0). Available from:  
601 <https://linkinghub.elsevier.com/retrieve/pii/S235246422030095X>
- 602 23. Barnabas R V., Brown ER, Onono MA, Bukusi EA, Njoroge B, Winer RL, et al. Efficacy of  
603 Single-Dose Human Papillomavirus Vaccination among Young African Women. *NEJM*  
604 *Evid* [Internet]. 2022 Apr 11 [cited 2022 Jun 20];1(5). Available from:  
605 <https://evidence.nejm.org/doi/abs/10.1056/EVIDoa2100056>
- 606 24. Whitworth HS, Gallagher KE, Howard N, Mounier-Jack S, Mbwanji G, Kreimer AR, et  
607 al. Efficacy and immunogenicity of a single dose of human papillomavirus vaccine  
608 compared to no vaccination or standard three and two-dose vaccination regimens: A  
609 systematic review of evidence from clinical trials. Vol. 38, *Vaccine.* Elsevier Ltd; 2020.  
610 p. 1302–14.

- 611 25. Jit M, Brisson M, Laprise JF, Choi YH. Comparison of two dose and three dose human  
612 papillomavirus vaccine schedules: Cost effectiveness analysis based on transmission  
613 model. *BMJ*. 2015 Jan 7;350. Available from:  
614 <http://www.bmj.com/content/350/bmj.g7584?tab=related#datasupp>
- 615 26. Burger EA, Campos NG, Sy S, Regan C, Kim JJ. Health and economic benefits of single-  
616 dose HPV vaccination in a Gavi-eligible country. *Vaccine*. 2018 Aug 6;36(32):4823–9.
- 617 27. Drolet M, Laprise JF, Martin D, Jit M, Bénard É, Gingras G, et al. Optimal human  
618 papillomavirus (HPV) vaccination strategies to prevent cervical cancer in low- and  
619 middle-income countries in the context of limited resources: A mathematical  
620 modeling analysis. *Lancet Infect Dis*. 2021;
- 621 28. Porras C, Sampson JN, Herrero R, Gail MH, Cortés B, Hildesheim A, et al. Rationale  
622 and design of a double-blind randomized non-inferiority clinical trial to evaluate one  
623 or two doses of vaccine against human papillomavirus including an epidemiologic  
624 survey to estimate vaccine efficacy: The Costa Rica ESCUDDO trial. *Vaccine*. 2022 Jan  
625 3;40(1):76–88.
- 626 29. ClinicalTrials.gov. Comparing One or Two Doses of the Human Papillomavirus Vaccine  
627 for the Prevention of Human Papillomavirus Infection, ESCUDDO Study:  
628 NCT03180034 [Internet]. [cited 2022 Feb 3]. Available from:  
629 <https://clinicaltrials.gov/ct2/show/NCT03180034>
- 630 30. Basu P, Malvi SG, Joshi S, Bhatla N, Muwonge R, Lucas E, et al. Vaccine efficacy  
631 against persistent human papillomavirus (HPV) 16/18 infection at 10 years after one,  
632 two, and three doses of quadrivalent HPV vaccine in girls in India: a multicentre,  
633 prospective, cohort study. *Lancet Oncol*. 2021 Nov 1;22(11):1518–29.
- 634 31. Single-dose-HPV-Vaccine-Evaluation-Consortium. Review of the current published  
635 evidence on single-dose HPV vaccination 3rd edition 2020. 2020.
- 636 32. Choi YH, Jit M, Gay N, Cox A, Garnett GP, Edmunds WJ. Transmission dynamic  
637 modelling of the impact of human papillomavirus vaccination in the United Kingdom.  
638 *Vaccine* [Internet]. 2010 May 28 [cited 2020 Oct 30];28(24):4091–102. Available from:  
639 <https://pubmed.ncbi.nlm.nih.gov/19909831/>
- 640 33. Brisson M, Laprise JF, Martin D, Drolet M, Van De Velde N, Boily MC. Technical  
641 Appendix HPV-ADVISE LMIC. 2017.
- 642 34. Van De Velde N, Boily MC, Drolet M, Franco EL, Mayrand MH, Kliewer E V., et al.  
643 Population-level impact of the bivalent, quadrivalent, and nonavalent human  
644 papillomavirus vaccines: A model-based analysis. *J Natl Cancer Inst* [Internet]. 2012  
645 Nov 21 [cited 2020 Oct 30];104(22):1712–23. Available from: [http://www.marc-  
646 brisson.net/HPVadvise.pdf](http://www.marc-brisson.net/HPVadvise.pdf)
- 647 35. Brisson M, Van De Velde N, Drolet M, Laprise JF, Boily MC. Technical Appendix HPV-  
648 ADVISE Canada [Internet]. 2012. Available from: [http://www.marc-  
649 brisson.net/HPVadvise.pdf](http://www.marc-brisson.net/HPVadvise.pdf)
- 650 36. Burger EA, Smith MA, Killen J, Sy S, Simms KT, Canfell K, et al. Projected time to  
651 elimination of cervical cancer in the USA: a comparative modelling study. *Lancet*  
652 *Public Heal* [Internet]. 2020 Apr 1 [cited 2021 Jan 12];5(4):e213–22. Available from:  
653 [www.thelancet.com/](http://www.thelancet.com/)
- 654 37. Hall AJ. The United Kingdom Joint Committee on Vaccination and Immunisation.  
655 *Vaccine*. 2010 Apr 19;28(SUPPL. 1):A54–7.
- 656 38. World Health Organization. Human papillomavirus vaccines: WHO position paper,  
657 May 2017. *Weekly Epidemiological Record= Relevé épidémiologique hebdomadaire*



- 658 [Internet]. 2017; Available from:  
659 [https://www.who.int/immunization/policy/position\\_papers/hpv/en/](https://www.who.int/immunization/policy/position_papers/hpv/en/)
- 660 39. World Health Organization. Meeting of the Strategic Advisory Group of Experts on  
661 immunization, October 2019 – conclusions and recommendations. *Wkly Epidemiol*  
662 *Rec Relev épidémiologique Hebd* [Internet]. 2019 [cited 2020 Nov 3];49(47):541–560.  
663 Available from: <http://www.who.int/wer/2019/wer9447/en/>
- 664 40. Laprise JF, Chesson HW, Markowitz LE, Drolet M, Martin D, Bénard É, et al.  
665 Effectiveness and cost-effectiveness of human papillomavirus vaccination through  
666 age 45 years in the United States. *Ann Intern Med*. 2020 Jan 7;172(1):22–9.
- 667 41. Brisson M, Laprise JF, Chesson HW, Drolet M, Malagón T, Boily MC, et al. Health and  
668 Economic Impact of Switching from a 4-Valent to a 9-Valent HPV Vaccination Program  
669 in the United States. *J Natl Cancer Inst*. 2016 Jan 1 [cited 2021 Jan 12];108(1).  
670 Available from: <https://pubmed.ncbi.nlm.nih.gov/26438574/>
- 671 42. Chesson HW, Laprise JF, Brisson M, Markowitz LE. Impact and Cost-effectiveness of 3  
672 Doses of 9-Valent Human Papillomavirus (HPV) vaccine among US females previously  
673 vaccinated with 4-valent hpv vaccine. *J Infect Dis*. 2016 Jun 1;213(11):1694–700.  
674 Available from: </pmc/articles/PMC4857476/?report=abstract>
- 675 43. Laprise JF, Markowitz LE, Chesson HW, Drolet M, Brisson M. Comparison of 2-dose  
676 and 3-dose 9-valent human papillomavirus vaccine schedules in the United States: A  
677 cost-effectiveness analysis. *J Infect Dis*. 2016 Sep 1;214(5):685–8.
- 678 44. Canfell K, Kim JJ, Brisson M, Keane A, Simms KT, Caruana M, et al. Mortality impact of  
679 achieving WHO cervical cancer elimination targets: a comparative modelling analysis  
680 in 78 low-income and lower-middle-income countries. *Lancet*. 2020 Feb  
681 22;395(10224):591–603. Available from:  
682 <http://www.thelancet.com/article/S0140673620301574/fulltext>
- 683 45. Drolet M, Bénard É, Pérez N, Brisson M, Ali H, Boily MC, et al. Population-level impact  
684 and herd effects following the introduction of human papillomavirus vaccination  
685 programmes: updated systematic review and meta-analysis. *Lancet*. 2019 Aug  
686 10;394(10197):497–509. Available from:  
687 <http://www.thelancet.com.libproxy1.nus.edu.sg/article/S0140673619302983/fulltext>
- 688 46. World Bank. GDP per capita (current US\$) | Data. Available from:  
689 <https://data.worldbank.org/indicator/NY.GDP.PCAP.CD>
- 690 47. Jit M. Informing Global Cost-Effectiveness Thresholds Using Country Investment  
691 Decisions: Human Papillomavirus Vaccine Introductions in 2006-2018. *Value Heal*.  
692 2020 Oct 16;
- 693 48. Ochalek J, Abbas K, Claxton K, Jit M, Lomas J. Assessing the value of human  
694 papillomavirus vaccination in Gavi-eligible low-income and middle-income countries.  
695 *BMJ Glob Heal*. 2020 Oct 20;5(10):e003006. Available from:  
696 <https://gh.bmj.com/lookup/doi/10.1136/bmjgh-2020-003006>
- 697 49. World Health Organization. WHO Guide on Standardization of Economic Evaluations  
698 of Immunization Programmes. WHO. 2019 Oct; Available from:  
699 [http://www.who.int/immunization/documents/who\\_ivb\\_19.10/en/](http://www.who.int/immunization/documents/who_ivb_19.10/en/)
- 700 50. World Health Organization. Pulse survey on continuity of essential health services  
701 during the COVID-19 pandemic: interim report, 27 August 2020. Available from:  
702 [https://www.who.int/publications/i/item/WHO-2019-nCoV-EHS\\_continuity-survey-](https://www.who.int/publications/i/item/WHO-2019-nCoV-EHS_continuity-survey-2020.1)  
703 [2020.1](https://www.who.int/publications/i/item/WHO-2019-nCoV-EHS_continuity-survey-2020.1)
- 704 51. Nelson R. COVID-19 disrupts vaccine delivery. *Lancet Infect Dis*. 2020 May

- 705 1;20(5):546. Available from: [www.thelancet.com/infection](http://www.thelancet.com/infection)
- 706 52. Abbas K, Procter SR, van Zandvoort K, Clark A, Funk S, Mengistu T, et al. Routine  
707 childhood immunisation during the COVID-19 pandemic in Africa: a benefit–risk  
708 analysis of health benefits versus excess risk of SARS-CoV-2 infection. *Lancet Glob  
709 Heal.* 2020 Oct 1;8(10):e1264–72. Available from: [www.thelancet.com/lancetgh](http://www.thelancet.com/lancetgh)
- 710 53. UNICEF Supply Division. Human papillomavirus (HPV) vaccine: supply and demand  
711 update | UNICEF Supply Division. Available from:  
712 [https://www.unicef.org/supply/reports/human-papillomavirus-hpv-vaccine-supply-  
713 and-demand-update](https://www.unicef.org/supply/reports/human-papillomavirus-hpv-vaccine-supply-and-demand-update)
- 714 54. World Health Organization. WHO and UNICEF warn of a decline in vaccinations during  
715 COVID-19. Available from: [https://www.who.int/news/item/15-07-2020-who-and-  
716 unicef-warn-of-a-decline-in-vaccinations-during-covid-19](https://www.who.int/news/item/15-07-2020-who-and-unicef-warn-of-a-decline-in-vaccinations-during-covid-19)
- 717 55. Suwantika AA, Boersma C, Postma MJ. The potential impact of COVID-19 pandemic  
718 on the immunization performance in Indonesia. *Expert Rev Vaccines.* 2020 Aug  
719 2;19(8):687–90. Available from:  
720 <https://www.tandfonline.com/doi/full/10.1080/14760584.2020.1800461>
- 721 56. Jit M, Levin C, Brisson M, Levin A, Resch S, Berkhof J, et al. Economic analyses to  
722 support decisions about HPV vaccination in low- and middle-income countries: A  
723 consensus report and guide for analysts. Vol. 11, *BMC Medicine.* BioMed Central;  
724 2013. p. 23. Available from:  
725 <http://bmcmedicine.biomedcentral.com/articles/10.1186/1741-7015-11-23>
- 726 57. Kim JJ, Brisson M, Edmunds WJ, Goldie SJ. Modeling Cervical Cancer Prevention in  
727 Developed Countries. *Vaccine.* 2008 Aug 19;26(SUPPL. 10):K76. Available from:  
728 </pmc/articles/PMC2769256/?report=abstract>
- 729 58. International Agency for Research on Cancer. Global Cancer Observatory. Available  
730 from: <https://gco.iarc.fr/>
- 731 59. Gillison ML, Chaturvedi AK, Lowy DR. HPV prophylactic vaccines and the potential  
732 prevention of noncervical cancers in both men and women. Vol. 113, *Cancer.* NIH  
733 Public Access; 2008. p. 3036–46. Available from:  
734 </pmc/articles/PMC6264789/?report=abstract>
- 735 60. United Nations Department of Economic and Social Affairs Population Division. World  
736 Population Prospects. 2019. Available from: <https://population.un.org/wpp/>
- 737 61. Baussano I, Lazzarato F, Brisson M, Franceschi S. Human papillomavirus vaccination at  
738 a time of changing sexual behavior. *Emerg Infect Dis.* 2016 Jan 1;22(1):18–23.  
739 Available from: </pmc/articles/PMC4696692/?report=abstract>
- 740 62. Wellings K, Collumbien M, Slaymaker E, Singh S, Hodges Z, Patel D, et al. Sexual  
741 behaviour in context: a global perspective. Vol. 368, *Lancet.* Elsevier Limited; 2006. p.  
742 1706–28. Available from: <https://pubmed.ncbi.nlm.nih.gov/17098090/>
- 743 63. Cutler D, Miller G. The role of public health improvements in health advances: The  
744 twentieth-century United States. *Demography.* 2005;42(1):1–22. Available from:  
745 <https://link-springer-com.ez.lshtm.ac.uk/article/10.1353/dem.2005.0002>
- 746 64. Goldstein JR, Lee RD. Demographic perspectives on the mortality of COVID-19 and  
747 other epidemics. *Proc Natl Acad Sci U S A.* 2020 Sep 8;117(36):22035–41. Available  
748 from: [www.pnas.org/cgi/doi/10.1073/pnas.2006392117](http://www.pnas.org/cgi/doi/10.1073/pnas.2006392117)
- 749 65. Ibarra FP, Mehrad M, Di Mauro M, Peraza Godoy MF, Cruz EG, Nilforoushzadeh MA,  
750 et al. Impact of the COVID-19 pandemic on the sexual behavior of the population. The  
751 vision of the east and the west. Vol. 46, *International Braz J Urol.* Brazilian Society of

752 Urology; 2020. p. 104–12. Available from: <http://orcid.org/0000-0003-4687-7353>  
753  
754  
755

## 756 **Abbreviations**

|       |                                                            |
|-------|------------------------------------------------------------|
| DALY  | Disability-adjusted life year                              |
| GDP   | Gross domestic product                                     |
| HPV   | Human papillomavirus                                       |
| LMICs | Low- and middle-income countries                           |
| PHE   | Public Health England                                      |
| PRIME | Papillomavirus Rapid Interface for Modelling and Economics |
| RR    | Risk ratios                                                |
| UI    | Uncertainty intervals                                      |
| UK    | United Kingdom                                             |
| US    | United States                                              |
| USD   | United States Dollar                                       |
| VE    | Vaccine efficacy                                           |
| WHO   | World Health Organization                                  |

757

## 758 **Funding**

759 Financial support for this project was provided by PATH on behalf of the Single-Dose HPV  
760 Vaccine Evaluation Consortium which includes Harvard University (Harvard), London School  
761 of Hygiene & Tropical Medicine (LSHTM), PATH, US National Cancer Institute (NCI),  
762 University of British Columbia, Canada (UBC), CHU de Québec-Université Laval, Quebec  
763 (CHU), University of Witwatersrand Reproductive Health and HIV Institute (Wits RHI), US  
764 Centers for Disease Control and Prevention (CDC), and the World Health Organization  
765 (WHO). The work was also part funded by the Bill & Melinda Gates Foundation  
766 (OPP1157270) and the Fonds de recherche du Québec - Santé (FRQS) Research Scholars  
767 award (to MB), and a Foundation scheme grant from the Canadian Institutes of Health  
768 Research (CIHR; grant number FDN-143283). This research was also enabled in part by  
769 support provided by Compute Canada ([www.computeCanada.ca](http://www.computeCanada.ca)).

770

771 The funders had no role in study design, data collection and analysis, decision to publish, or  
772 preparation of the manuscript.

773

## 774 **Authors' Contributions**

775 KP and MJ conceptualised the study, curated and analysed the data, interpreted the findings, and  
776 drafted manuscript. YHC, EB, EAB, LH, and JFL curated and analysed the data, interpreted the  
777 findings, and were major contributors in writing the manuscript. JJK and MB interpreted the findings  
778 and were major contributors in writing the manuscript. MCR, MD, SS, KA, and AP analysed the data,  
779 interpreted the findings, and reviewed the manuscript. All authors read and approved the final  
780 manuscript.

781

782 **Declaration of interests**

783 We declare no competing interests.

784 **Data availability**

785 All analysis codes are available at <https://github.com/kieshaprem/hpv-1-dose>.

786 **Acknowledgement**

787 We thank members of the Single-Dose HPV Vaccine Evaluation Consortium for comments  
788 and helpful discussion on this work.

789

790

791

## 792 Figure captions

793

794 **Fig 1. Overview of the data sources and the key steps of the modelling.** To compare the impact and  
795 cost-effectiveness of one-dose versus two-dose vaccination in 188 countries, we adopted a hybrid  
796 approach. First, we synthesised the age-specific impact of HPV vaccines of three published  
797 transmission dynamic models—PHE, HPV-ADVISE, Harvard—from 10 model-country settings.  
798 Second, we derived the primary impact of vaccination using a static model (PRIME). Third, we  
799 extrapolated the primary and secondary effects to the remaining countries in the world. Fourth, we  
800 measured and compared population-level impact (e.g., cervical cancers averted, number of females  
801 needed to be vaccinated, threshold costs of the first and second dose of the vaccine) for three  
802 vaccine strategies: no HPV vaccination (the counterfactual); a one-dose HPV vaccination schedule in  
803 which we assume that one dose of the vaccine provides either a shorter duration of protection (20  
804 or 30 years) or lower vaccine efficacy (i.e., 80%) compared to two doses; and a two-dose HPV  
805 vaccination schedule in which two doses of the vaccine provides lifetime protection.

806

807 **Fig 2. Cervical cancers averted by routine one-dose HPV vaccination by country income groups.**

808 The lines represent the median projections of the 10 model-country settings: the PHE model in  
809 black, HPV-ADVISE model-country pairs in red, and the Harvard model-country pairs in blue. The  
810 grey area corresponds to the additional cases averted in the vaccinated cohort after the 100 years of  
811 routine vaccination. Cancers averted were discounted at 0%. Only cervical cancer caused by HPV 16,  
812 18, 31, 33, 45, 52, and 58, which could be averted by the 9-valent HPV vaccine, were considered.

813

814 **Fig 3. Cervical cancers averted by routine one-dose HPV vaccination as a proportion of cervical  
815 cancers averted by routine HPV vaccination programmes conferring lifelong protection at 100%  
816 vaccine efficacy.**

817 The median percentage (intervals: 10–90th percentile) of cancers averted by a  
818 one-dose schedule compared to a two-dose programme of the 10 model-country settings: the PHE  
819 model in black, HPV-ADVISE model-country pairs in red, and the Harvard model-country pairs in  
820 blue. Health outcomes were discounted at 0%. Only cervical cancer caused by HPV 16, 18, 31, 33, 45,  
821 52, and 58, which could be averted by the 9-valent HPV vaccine, were considered.

821

822 **Fig 4. Number of girls needed to be vaccinated with the first and second dose to avert one  
823 additional cervical cancer case by income group.**

824 The lines represent the median projections of the  
825 10 model-country settings: the PHE model in black, HPV-ADVISE model-country pairs in red, and the  
826 Harvard model-country pairs in blue. The grey area corresponds to the additional cases averted in  
827 the vaccinated cohort after the 100 years of routine vaccination. Health outcomes were discounted  
828 at 3% (panels A–D) and 0% (panels E–H).

828

829 **Fig 5. Threshold cost to pay for the first and second dose of vaccine by country income groups.**

830 The threshold cost is the maximum that could be paid for the first dose (compared to no vaccination)  
831 and second dose (compared to one dose only) for the incremental cost-effectiveness ratio to remain  
832 below the cost-effectiveness threshold. Two cost-effectiveness thresholds are presented: a lower  
833 threshold as suggested by Jit (2020) in panels A–D and country gross domestic product (GDP) per  
834 capita (in 2017 USD) in panels E–H. The lower cost-effectiveness threshold presented in panels A–D  
835 is 30–40% and 60–65% of GDP per capita in low-income and middle- to high-income countries,  
836 respectively. Cost and health outcomes were discounted at 3% and 0%, respectively.

837

838 **Figures**

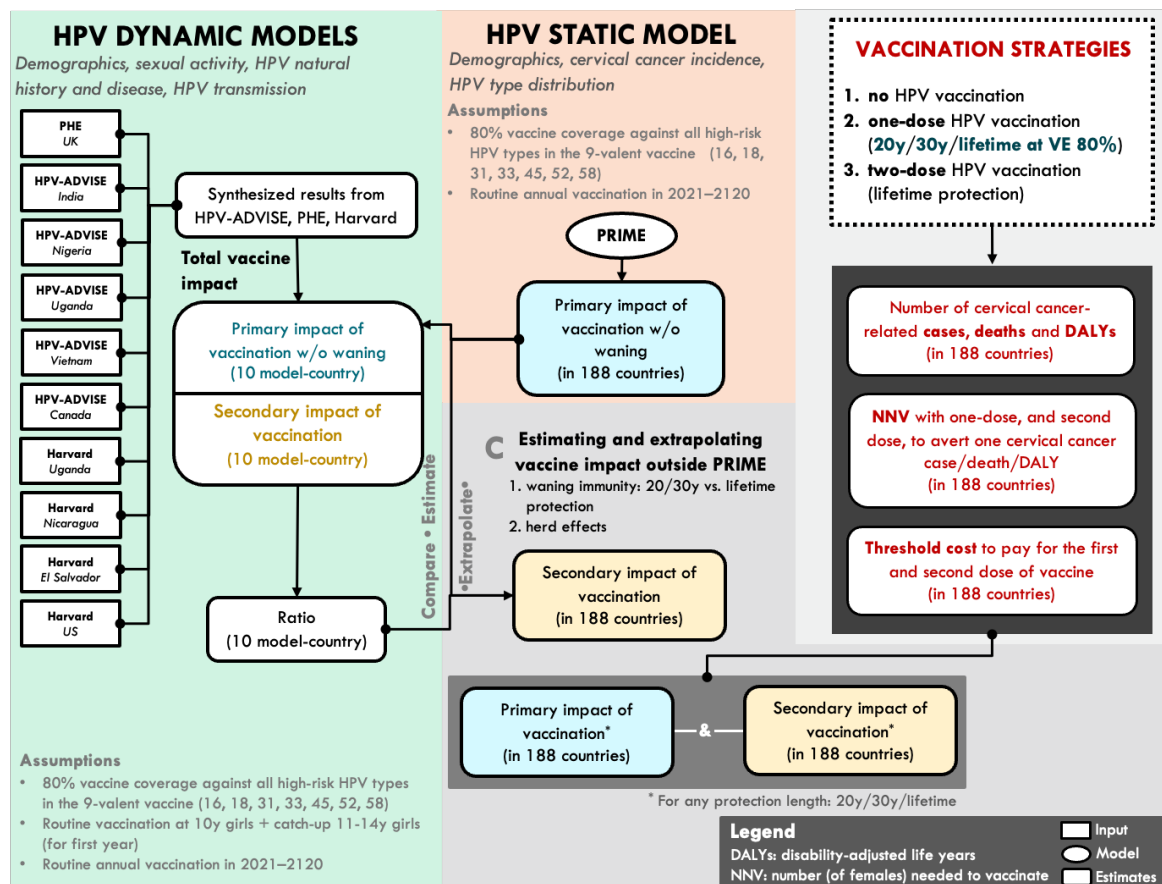

**Figure 1. Overview of the data sources and the key steps of the modelling.** To compare the impact and cost-effectiveness of one-dose versus two-dose vaccination in 188 countries, we adopted a hybrid approach. First, we synthesised the age-specific impact of HPV vaccines of three published transmission dynamic models—PHE, HPV-ADVISE, Harvard—from 10 model-country settings. Second, we derived the primary impact of vaccination using a static model (PRIME). Third, we extrapolated the primary and secondary effects to the remaining countries in the world. Fourth, we measured and compared population-level impact (e.g., cervical cancers averted, number of females needed to be vaccinated, threshold costs of the first and second dose of the vaccine) for three vaccine strategies: no HPV vaccination (the counterfactual); a one-dose HPV vaccination schedule in which we assume that one dose of the vaccine provides either a shorter duration of protection (20 or 30 years) or lower vaccine efficacy (i.e., 80%) compared to two doses; and a two-dose HPV vaccination schedule in which two doses of the vaccine provides lifetime protection.

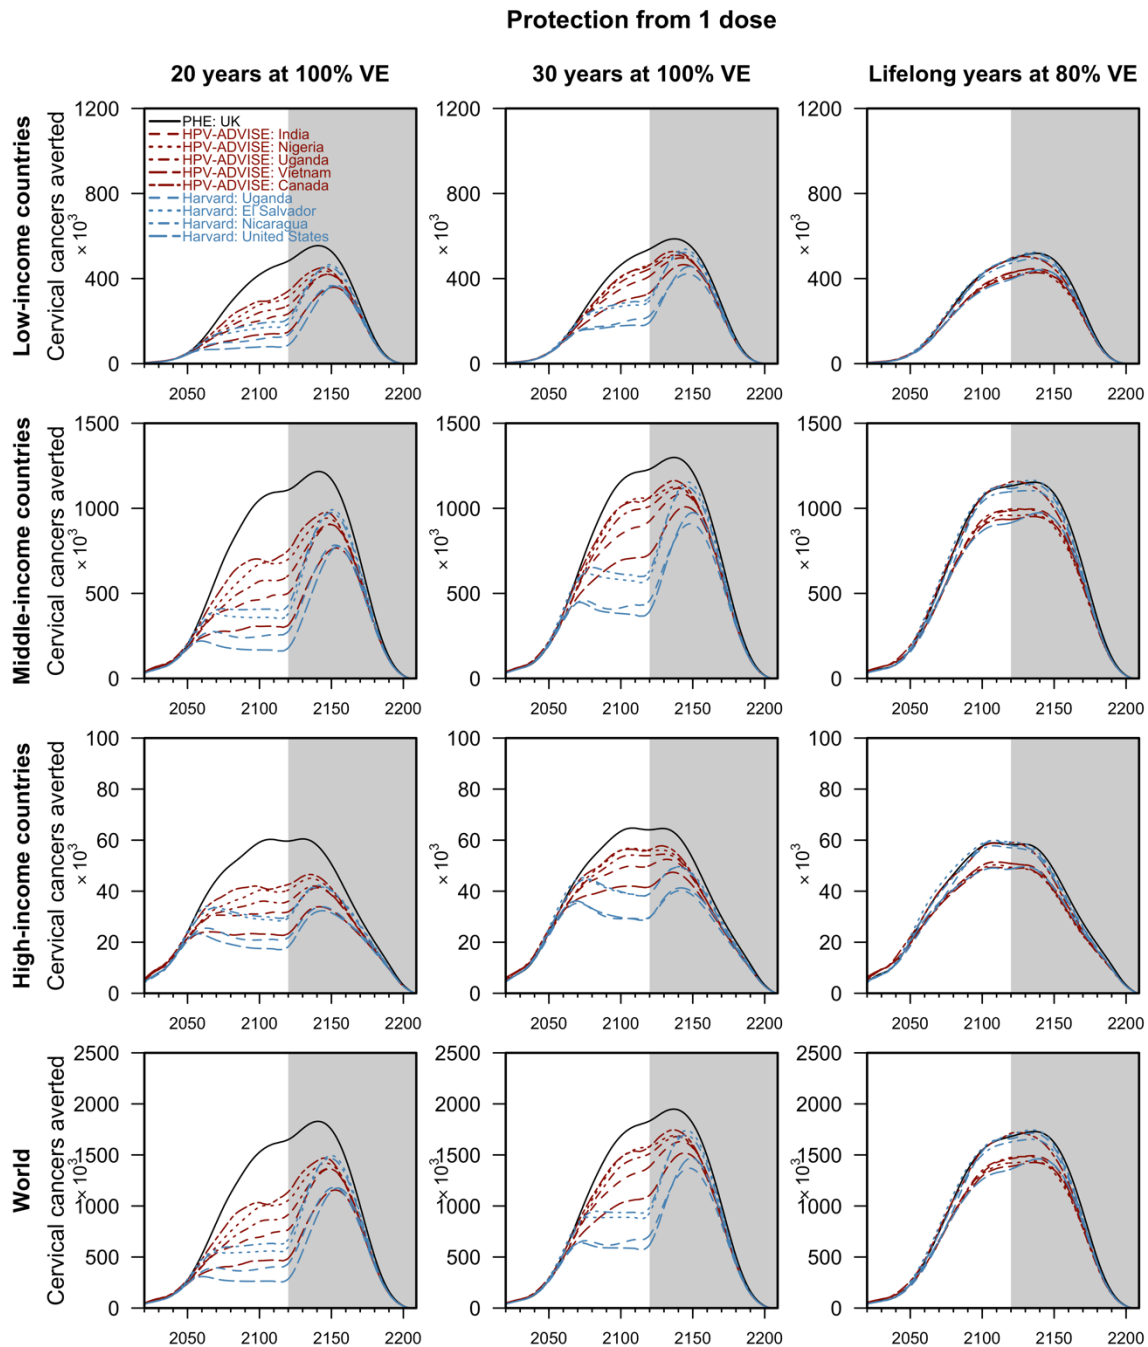

The lines represent the median projections of the 10 model-country settings: the PHE model in black, HPV-ADVISE model-country pairs in red, and the Harvard model-country pairs in blue. The grey area corresponds to the additional cases averted in the vaccinated cohort after the 100 years of routine vaccination. Cancers averted (health outcomes) were discounted at 0%. Only cervical cancer caused by HPV 16, 18, 31, 33, 45, 52 and 58, which could be averted by the 9-valent HPV vaccine, were considered.

840  
841



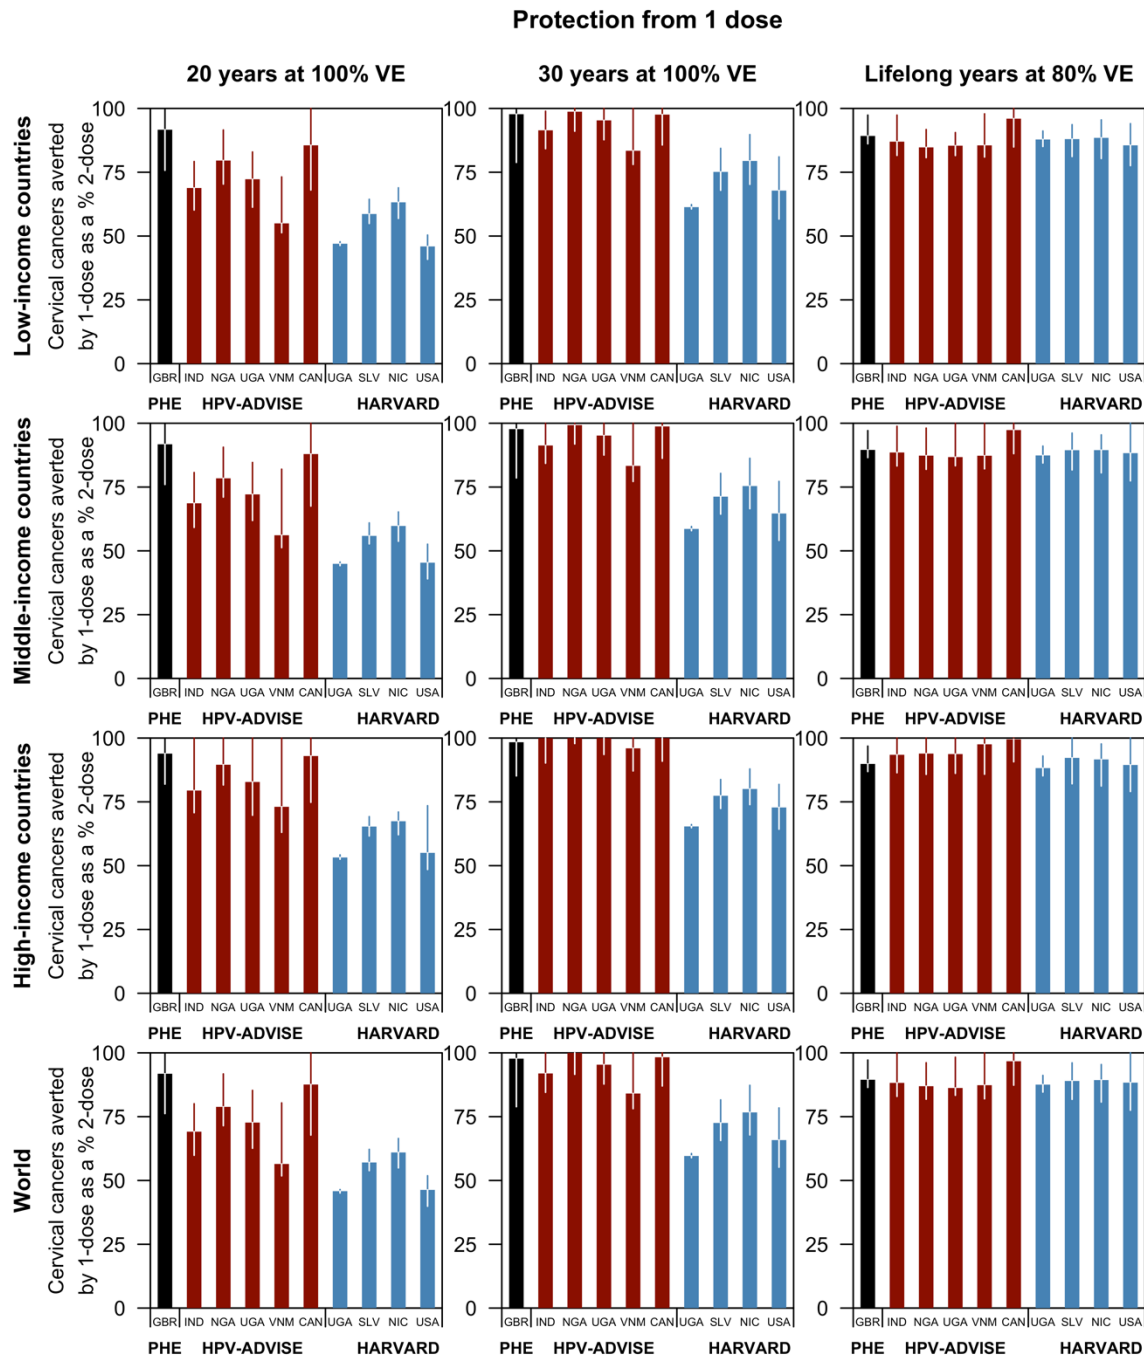

**Figure 3. Cervical cancers averted by routine one-dose HPV vaccination as a proportion of cervical cancers averted by routine HPV vaccination programmes conferring lifelong protection at 100% vaccine efficacy.** The median percentage (intervals: 10–90th percentile) of cancers averted by a one-dose schedule compared to a two-dose programme of the 10 model-country settings: the PHE model in black, HPV-ADVISE model-country pairs in red, and the Harvard model-country pairs in blue. Health outcomes were discounted at 0%. Only cervical cancer caused by HPV 16, 18, 31, 33, 45, 52 and 58, which could be averted by the 9-valent HPV vaccine, were considered.

842  
843  
844

845

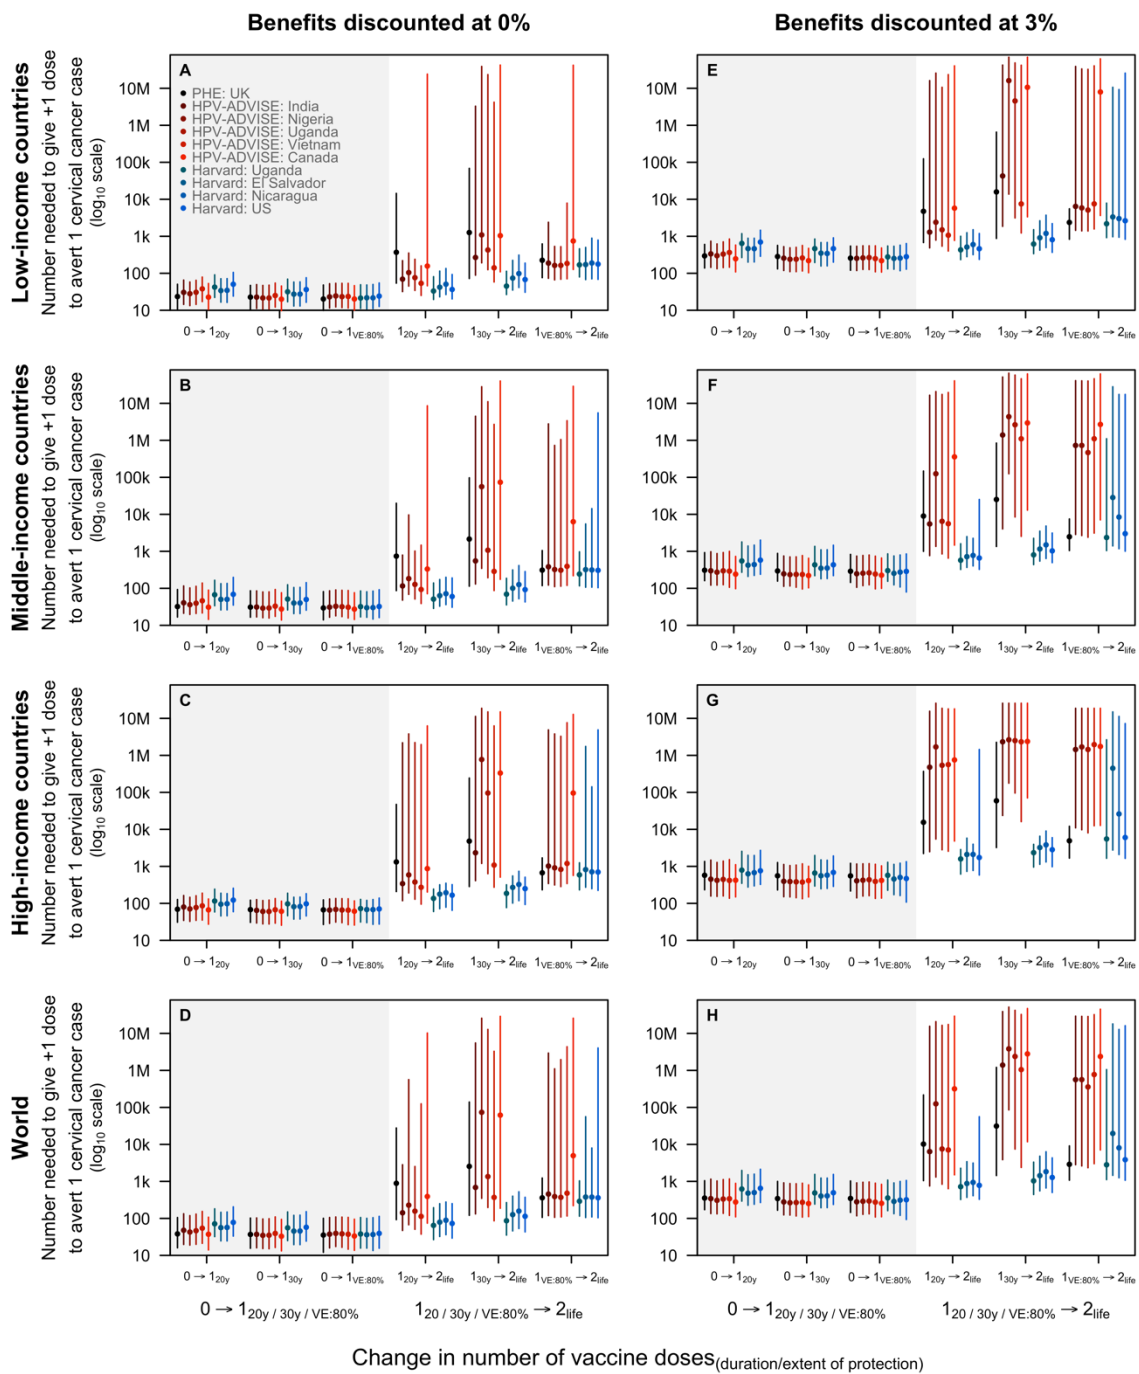

**Figure 4. Number of girls needed to be vaccinated with the first and second dose to avert one additional cervical cancer case by income group.** The lines represent the median projections of the 10 model-country settings: the PHE model in black, HPV-ADVISE model-country pairs in red, and the Harvard model-country pairs in blue. The grey area corresponds to the additional cases averted in the vaccinated cohort after the 100 years of routine vaccination. Health outcomes were discounted at 3% (panels A–D) and 0% (panels E–H).

846  
847

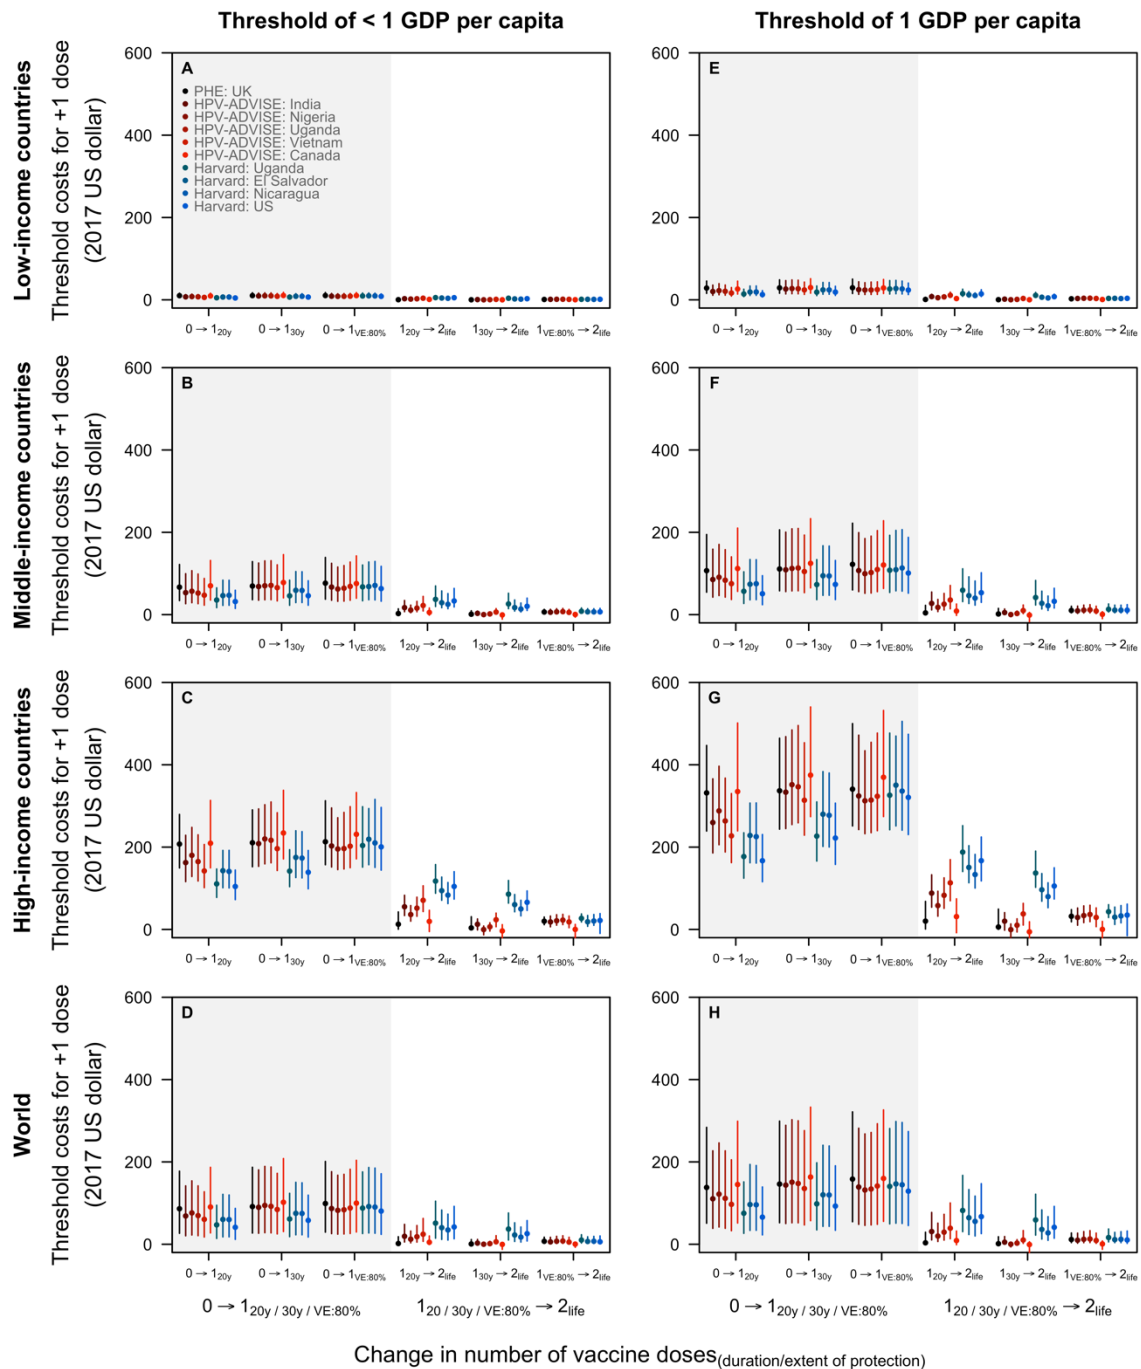

**Figure 5. Threshold cost to pay for the first and second dose of vaccine by country income groups.** The threshold cost is the maximum that could be paid for the first dose (compared to no vaccination) and second dose (compared to one dose only) for the incremental cost-effectiveness ratio to remain below the cost-effectiveness threshold. Two cost-effectiveness thresholds are presented: a lower threshold as suggested by Jit (2020) in panels A–D and country gross domestic product (GDP) per capita (in 2017 USD) in panels E–H. The lower cost-effectiveness threshold presented in panels A–D is 30–40% and 60–65% of GDP per capita in low-income and middle- to high-income countries, respectively. Cost and health outcomes were discounted at 3% and 0%, respectively.

## HPV DYNAMIC MODELS

Demographics, sexual activity, HPV natural history and disease, HPV transmission

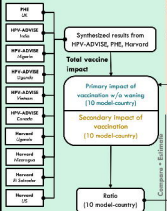

## HPV STATIC MODEL

Demographics, cervical cancer incidence, HPV type distribution

Assumptions

- 80% vaccine coverage against all high-risk HPV types in the 9-valent vaccine (16, 18, 31, 33, 45, 52, 58)
- Routine annual vaccination in 2021–2120

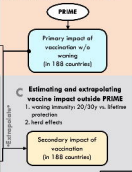

## VACCINATION STRATEGIES

1. no HPV vaccination
2. one-dose HPV vaccination (20y/30y/lifetime at VE 80%)
3. two-dose HPV vaccination (lifetime protection)

Number of cervical cancer-related cases, deaths and DALYs (in 188 countries)

NNV with one-dose, and second dose, to avert one cervical cancer case/death/DALY (in 188 countries)

Threshold cost to pay for the first and second dose of vaccine (in 188 countries)

Assumptions

- 80% vaccine coverage against all high-risk HPV types in the 9-valent vaccine (16, 18, 31, 33, 45, 52, 58)
- Routine vaccination at 10y girls + catch-up 11–14y girls (for first year)
- Routine annual vaccination in 2021–2120

### Legend

DALYs: disability-adjusted life years

NNV: number (of females) needed to vaccinate

Input

Model

Estimates

# Protection from 1 dose

20 years at 100% VE

30 years at 100% VE

Lifelong years at 80% VE

Low-income countries

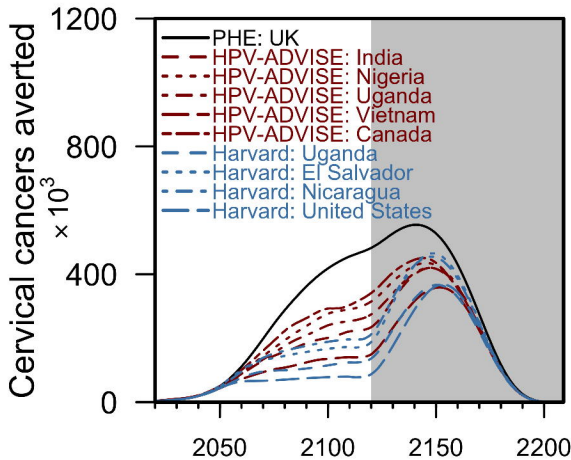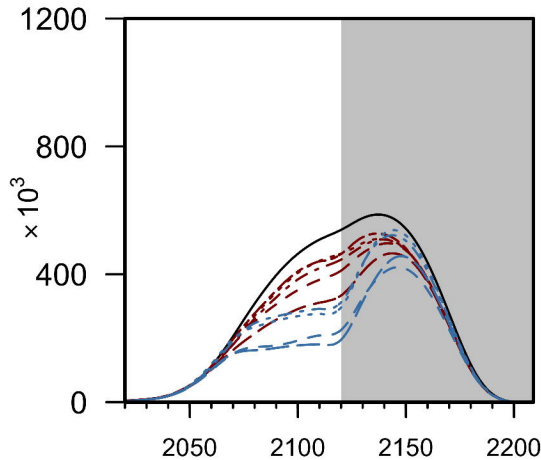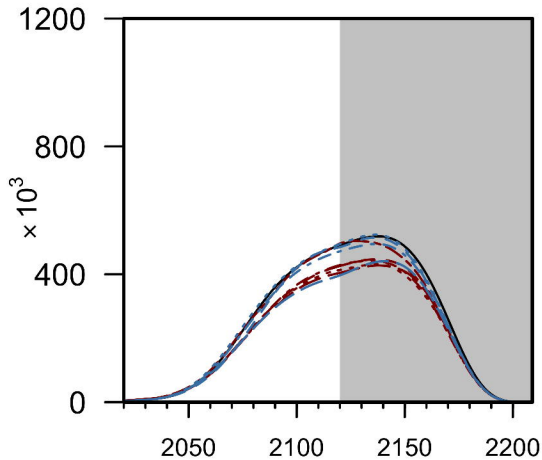

Middle-income countries

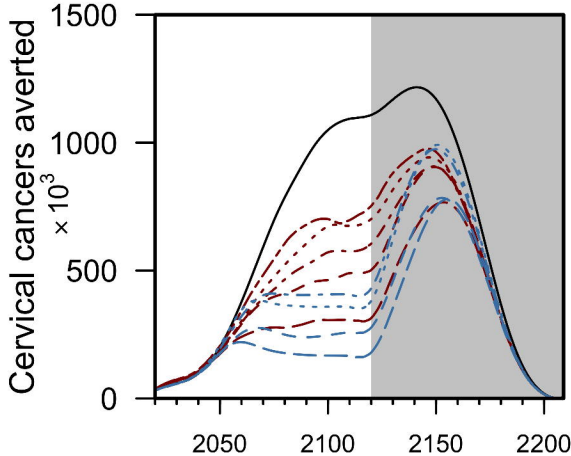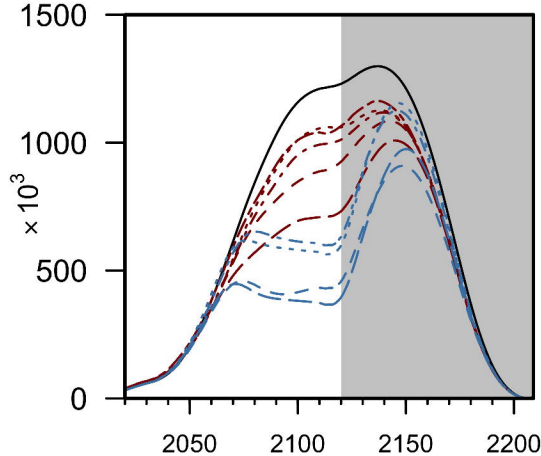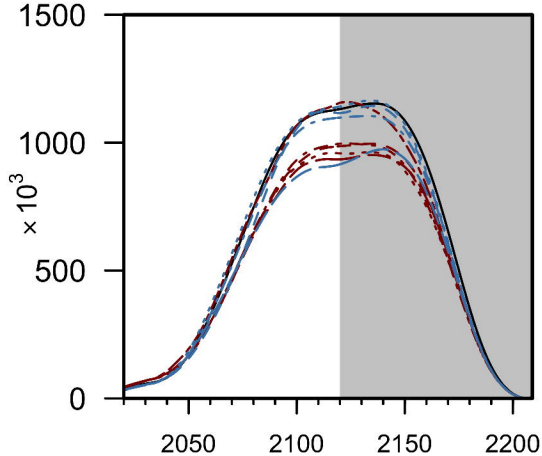

High-income countries

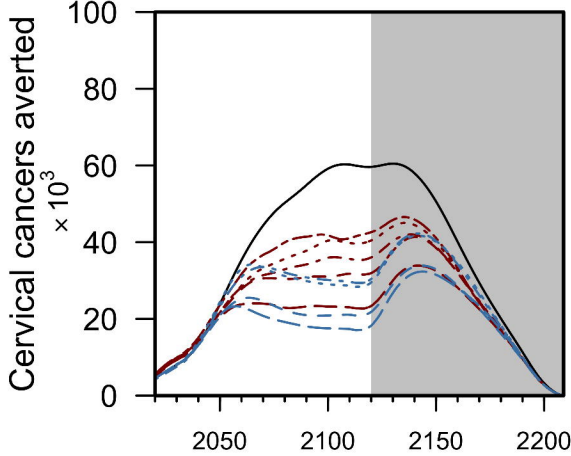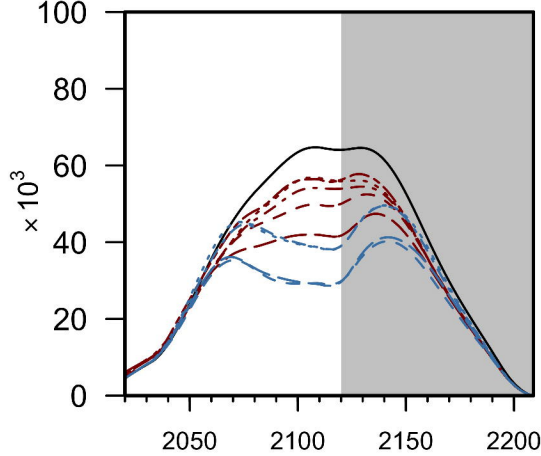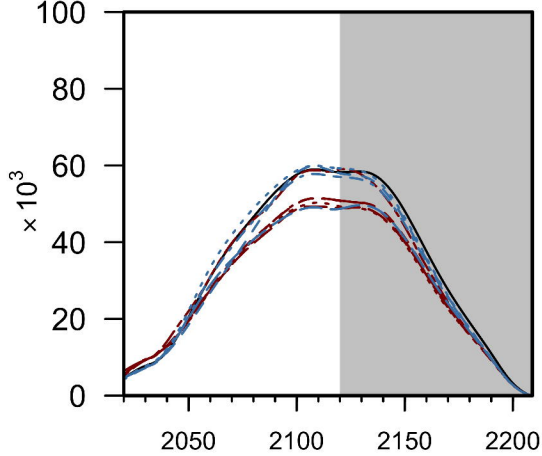

World

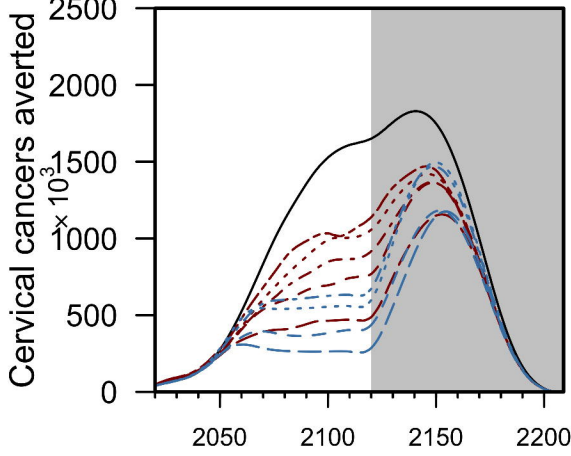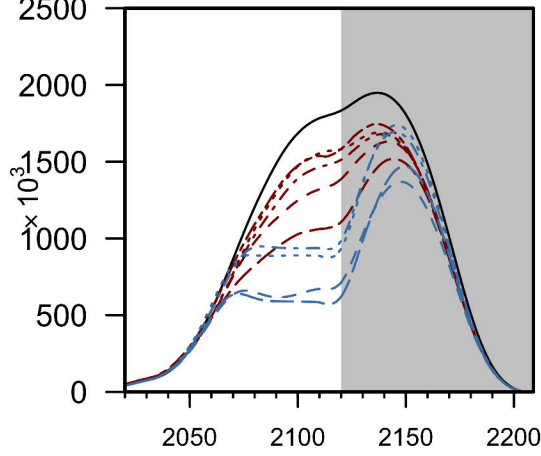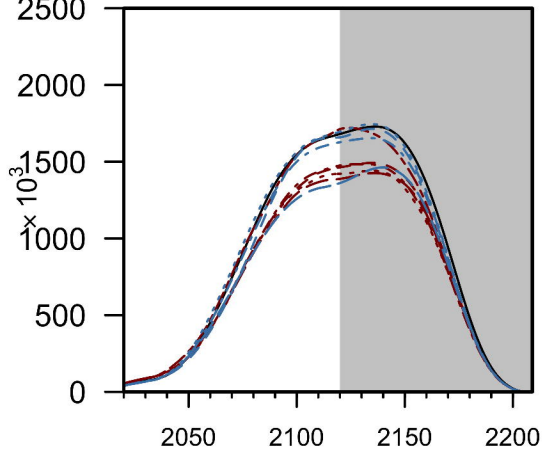

# Protection from 1 dose

## 20 years at 100% VE

## 30 years at 100% VE

## Lifelong years at 80% VE

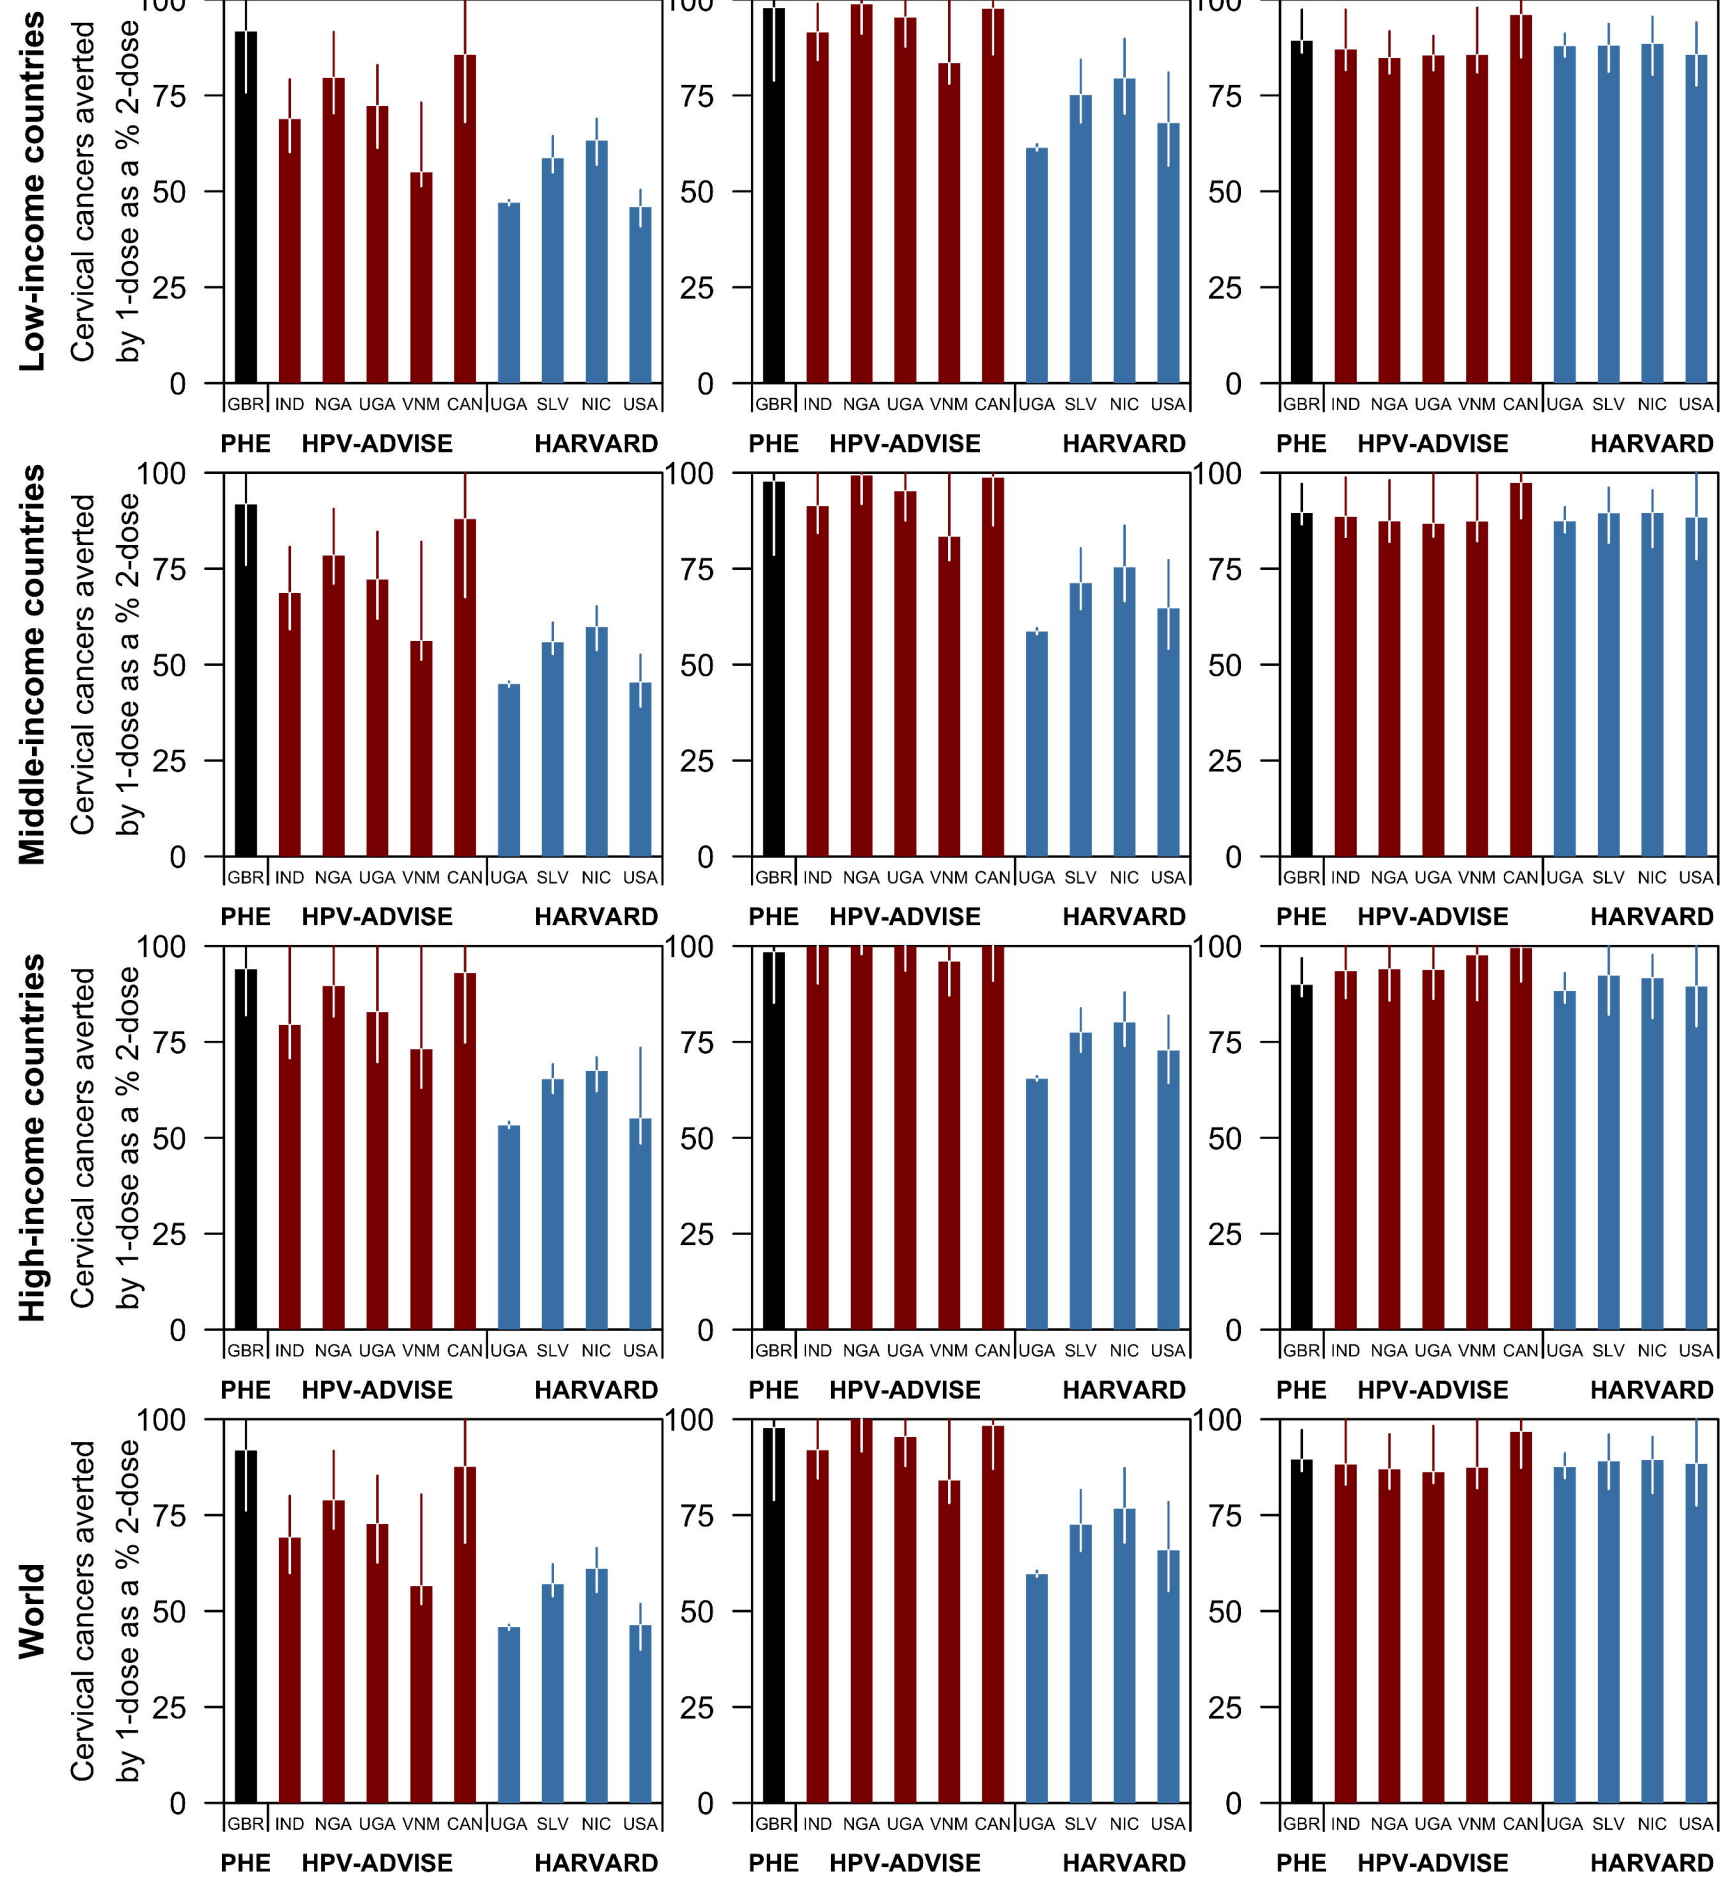

## Benefits discounted at 0%

## Benefits discounted at 3%

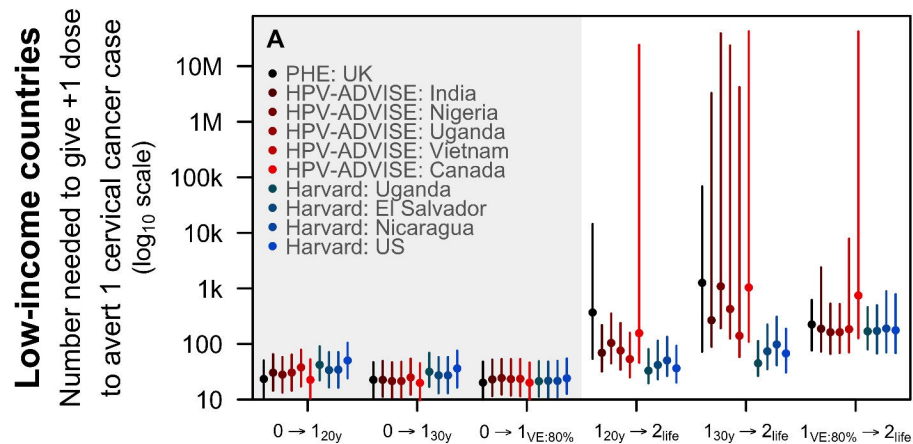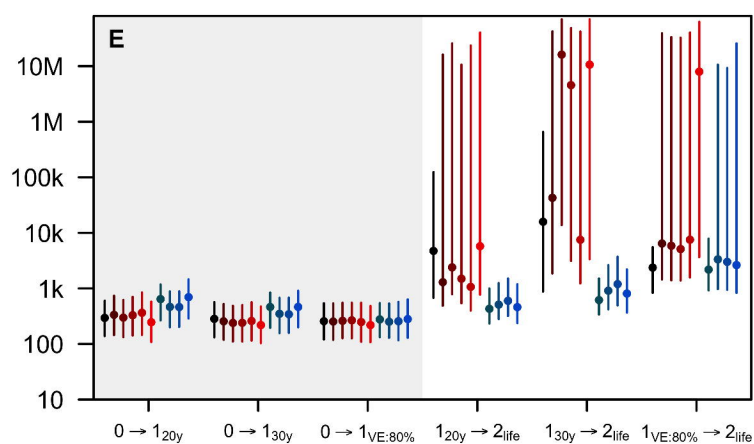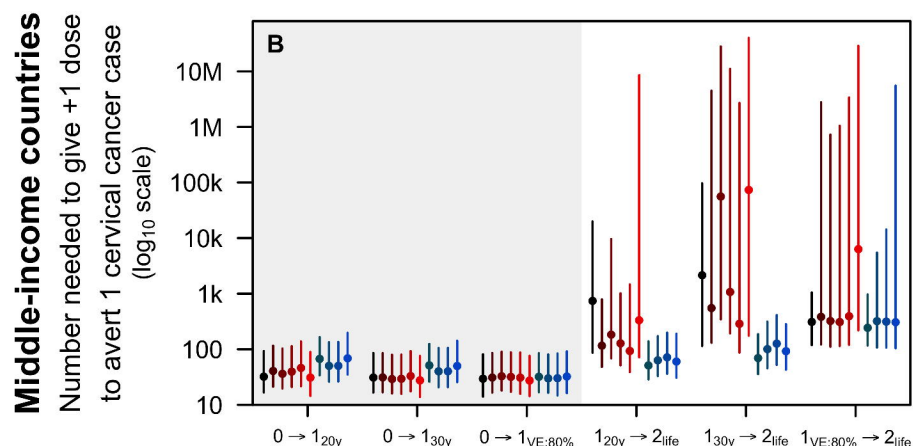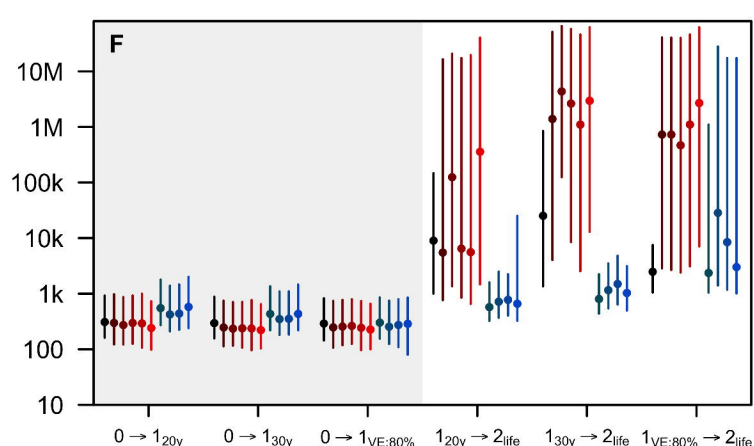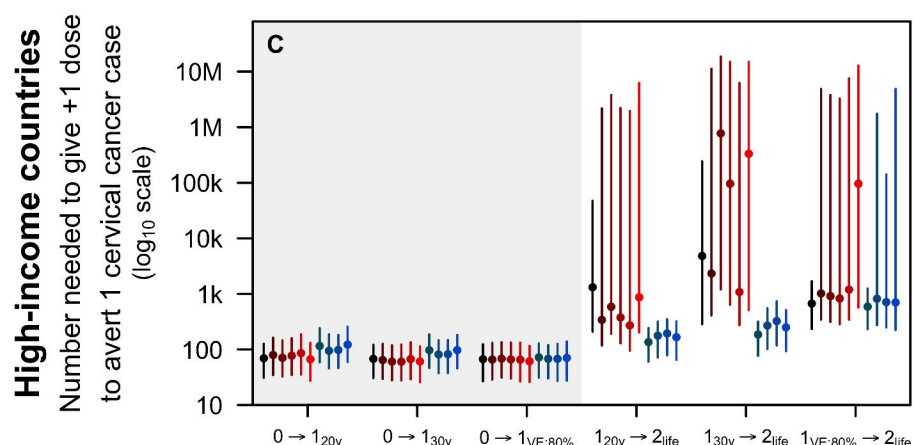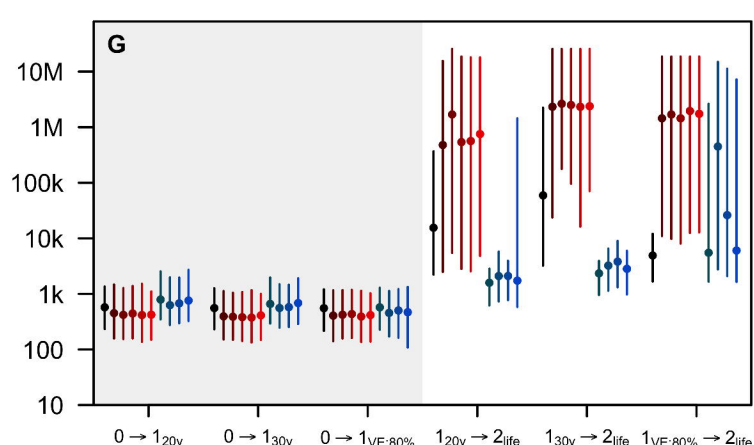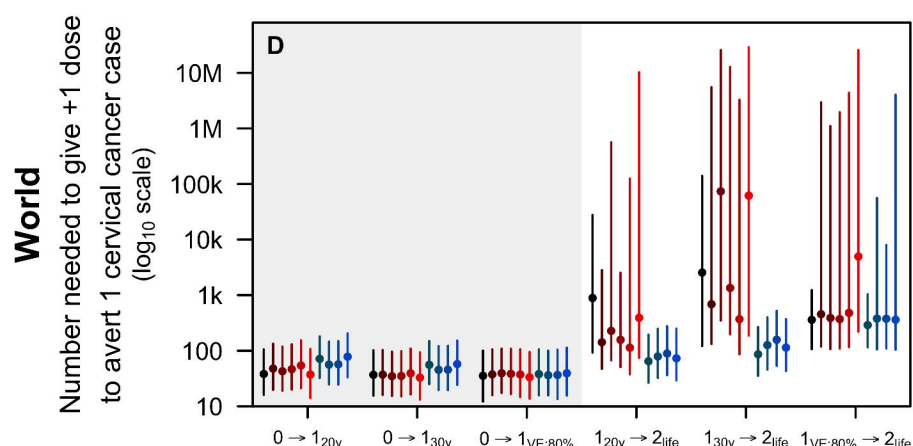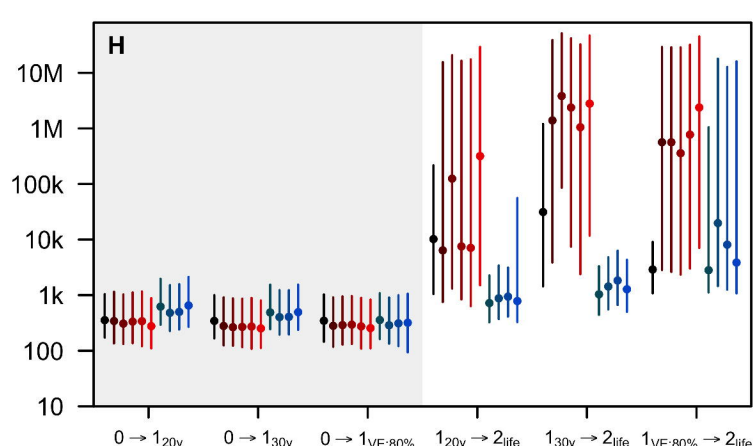

0 → 1<sub>20y / 30y / VE:80%</sub>      1<sub>20 / 30y / VE:80%</sub> → 2<sub>life</sub>

0 → 1<sub>20y / 30y / VE:80%</sub>      1<sub>20 / 30y / VE:80%</sub> → 2<sub>life</sub>

Change in number of vaccine doses<sub>(duration/extent of protection)</sub>

### Threshold of < 1 GDP per capita

### Threshold of 1 GDP per capita

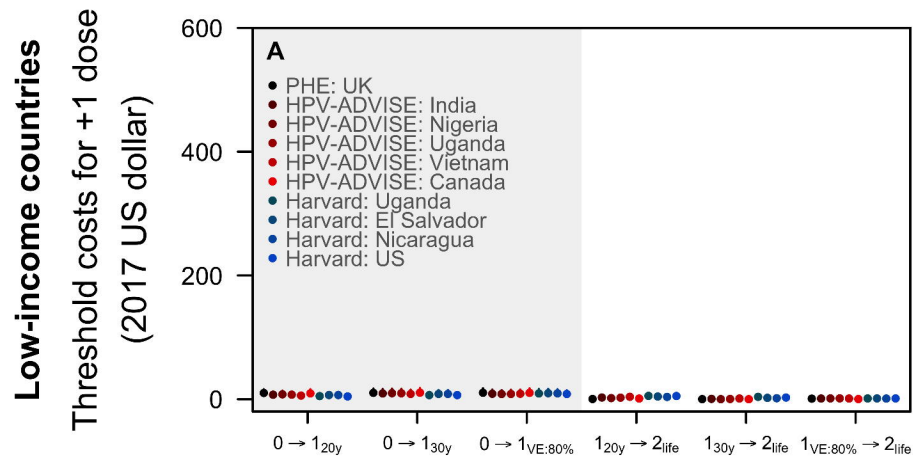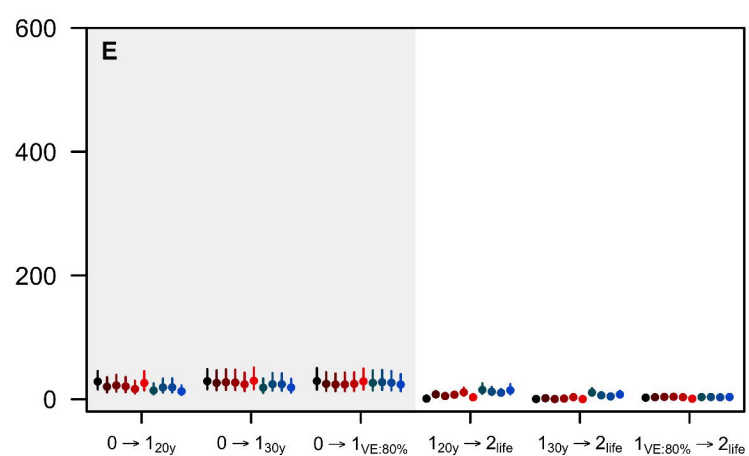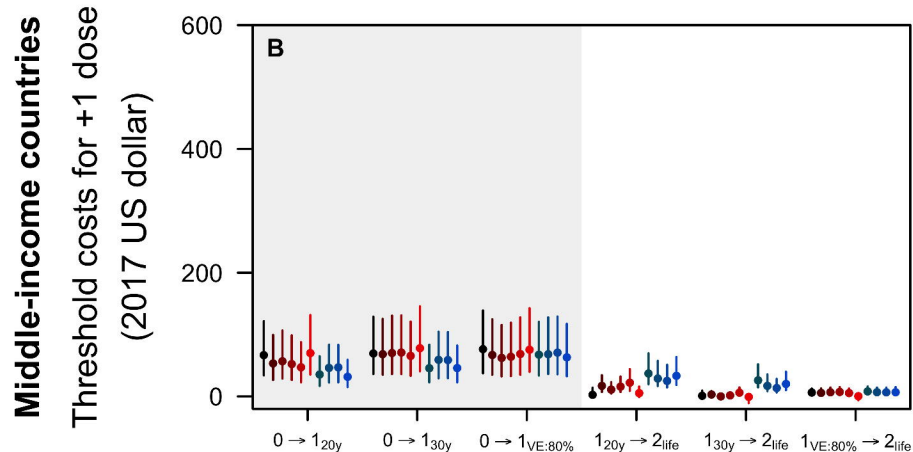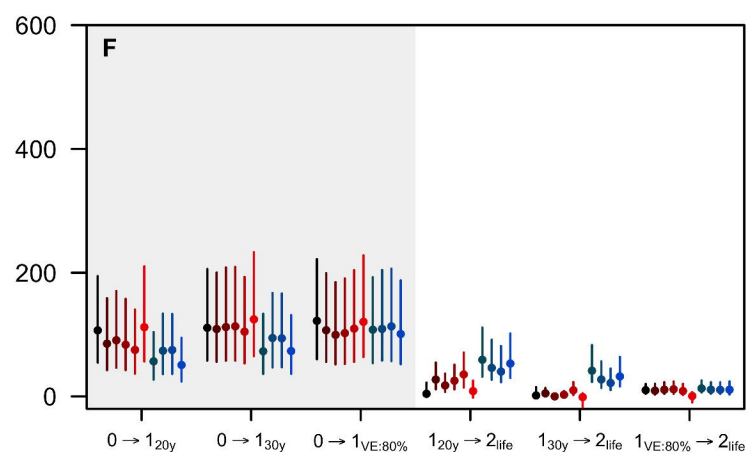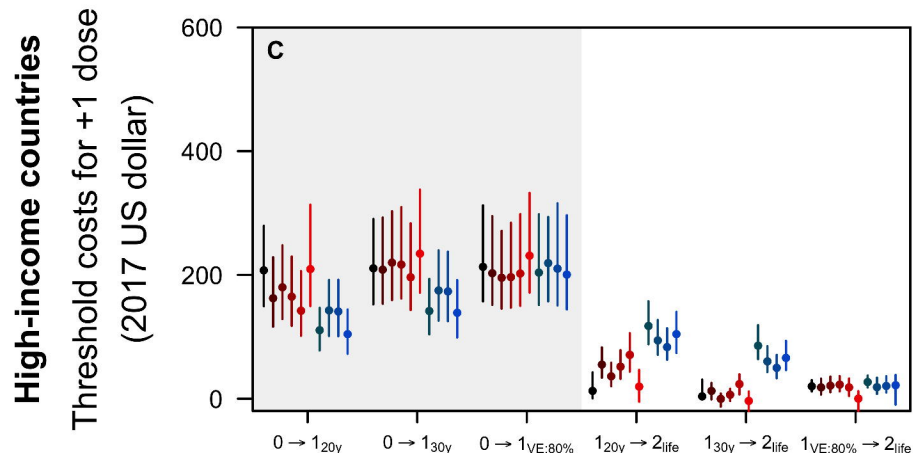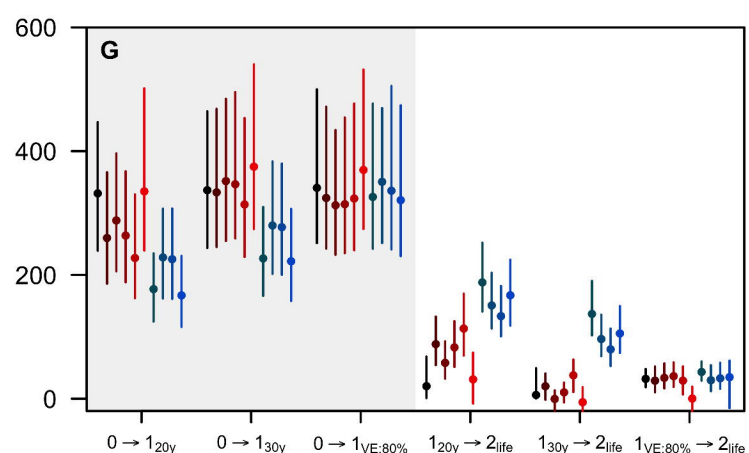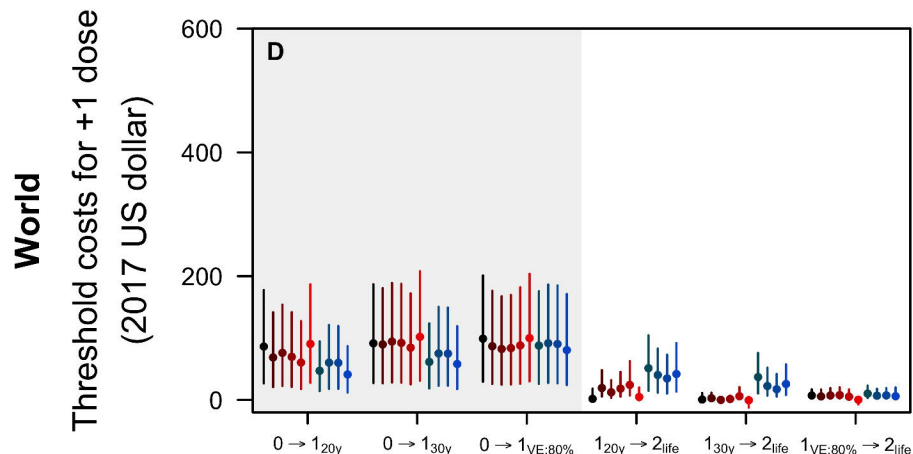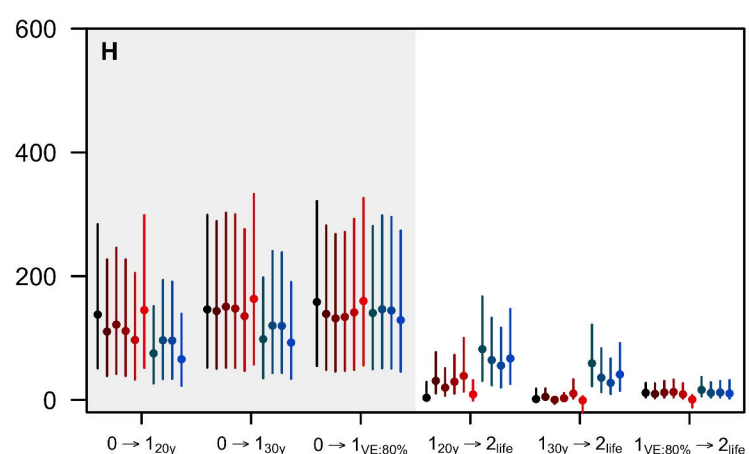

0 → 1<sub>20y / 30y / VE:80%</sub>      1<sub>20 / 30y / VE:80%</sub> → 2<sub>life</sub>

0 → 1<sub>20y / 30y / VE:80%</sub>      1<sub>20 / 30y / VE:80%</sub> → 2<sub>life</sub>

Change in number of vaccine doses<sub>(duration/extent of protection)</sub>
